# Supplementary material for: Estimated impact of a tobacco-elimination strategy on lung-cancer mortality in 185 countries: a population-based birth-cohort simulation study
Source: PubMed Central journal article supplement — Lancet Public Health. 2024 Oct 2;9(10):e745–54. doi: 10.1016/S2468-2667(24)00185-3 (PMC11447277; doi:10.1016/s2468-2667(24)00185-3), 2024-10-02
Supplement: mmc1.pdf [file mmc1.pdf]

# THE LANCET

## Public Health

### Supplementary appendix

This appendix formed part of the original submission and has been peer reviewed. We post it as supplied by the authors.

Supplement to: Rey Brandariz J, Runggay H, Ayo-Yusuf O, et al. Estimated impact of a tobacco-elimination strategy on lung-cancer mortality in 185 countries: a population-based birth-cohort simulation study. *Lancet Public Health* 2024; **9**: e745-54.

## Supplementary material

### Table of contents

|                                                                                                                                                                                                                 |    |
|-----------------------------------------------------------------------------------------------------------------------------------------------------------------------------------------------------------------|----|
| Appendix 1. Norpred model and estimates of lung cancer mortality by country .....                                                                                                                               | 2  |
| Mortality Data .....                                                                                                                                                                                            | 2  |
| Incidence Data .....                                                                                                                                                                                            | 2  |
| Appendix 2. Estimated lung cancer mortality rate in 2022 (by period) and in the birth cohort studied (for those born in 2006-2010) .....                                                                        | 5  |
| Appendix 3. Period/cohort ratio estimation .....                                                                                                                                                                | 8  |
| Ratio selection to convert period rates to cohort rates.....                                                                                                                                                    | 8  |
| Limit application on ratios .....                                                                                                                                                                               | 8  |
| Appendix 4. Lung cancer mortality rates in never-smokers .....                                                                                                                                                  | 15 |
| Cancer Prevention Study phase II.....                                                                                                                                                                           | 15 |
| Korean Cancer Prevention Study.....                                                                                                                                                                             | 15 |
| Cancer Incidence in Five Continents.....                                                                                                                                                                        | 16 |
| Appendix 5. Population impact fraction .....                                                                                                                                                                    | 18 |
| Appendix 6. Sensitivity analyses.....                                                                                                                                                                           | 19 |
| Sensitivity analysis 1 .....                                                                                                                                                                                    | 19 |
| Sensitivity analysis 2 .....                                                                                                                                                                                    | 22 |
| Appendix 7. Percentage and age-standardised rates (ASRs per 100,000) of lung cancer deaths expected and prevented if tobacco smoking was eliminated in the 2006-2010 birth cohort by sex and world region. .... | 25 |
| Appendix 8. Number of expected and prevented lung cancer deaths, population impact fraction and age-standardised rate of expected and prevented lung cancer deaths in men, women, and total by country. ....    | 26 |
| References.....                                                                                                                                                                                                 | 35 |

## **Appendix 1. Nordpred model and estimates of lung cancer mortality by country**

Prediction of sex- and age-specific lung cancer rates up to 2040–2044 for the 82 countries was performed using the Nordpred software package in R version 4.3.0. The Nordpred model is based on the age-period-cohort model in which a power function instead of a logarithmic function was used to level off the exponential growth of future rates. The model, mathematically, is written as:  $R_{ap} = (A_a + D \cdot p + P_p + C_c)$ , where  $R_{ap}$  is defined as the mortality rate in the age group (a) and in the calendar period (p). D is defined as the common drift parameter.  $A_a$  is defined as the age component of the age group (a).  $P_p$  is defined as the non-linear period component of the period (p).  $C_c$  is defined as the non-linear cohort component of the cohort (c). A drift reduction of 25% in the second period, 50% in the third period and 75% in the fourth and fifth periods was applied in order to reduce the influence of the current trend on predictions as recommended by the authors of the model.<sup>1</sup>

To perform the prediction of lung cancer mortality rates using the Nordpred model<sup>1</sup> lung cancer mortality data in periods of five years were extracted from different data sources:

### Mortality Data

Lung cancer mortality data for 75 countries were extracted from the World Health Organization (WHO) mortality database. Data were extracted for 15 to 25 years divided into 5-year periods, depending on availability, from the most recent to the oldest data.

### Incidence Data

Lung cancer incidence data were extracted for 7 countries which did not have lung cancer mortality data available (i.e., Belarus, China, India, Kuwait, Thailand, Turkey and Uganda) from the Cancer Incidence Five Continents (CI5plus) database. These data are from subnational registries. China: Cancer registry of Hong Kong and Shanghai; India: Cancer registry of Chennai; Kuwait: Kuwaitis; Thailand: Cancer registry of Chiang Mai, Khon Kaen, Songkhla and Lampang; Turkey: Antalya and Izmir. In Uganda, data between the years 2013-2015 were obtained from the Kampala Cancer Registry. A total of 25 years of data were also extracted, divided into 5-year periods from the most recent data, except for Thailand, where 20 years of incidence data were available and for Kuwait and Turkey, where 15 years were available.

**Supplementary Table 1.1. Data sources, observed and predicted time periods for prediction of lung cancer mortality or incidence for 82 countries.**

| Country            | Observed mortality | Predicted mortality | Data source                                          |
|--------------------|--------------------|---------------------|------------------------------------------------------|
| Albania            | 1996-2010          | 2020-2044           | WHO mortality database                               |
| Argentina          | 1994-2018          | 2020-2044           | WHO mortality database                               |
| Australia          | 1994-2018          | 2020-2044           | WHO mortality database                               |
| Austria            | 1995-2019          | 2020-2044           | WHO mortality database                               |
| Azerbaijan         | 1988-2002          | 2020-2044           | WHO mortality database                               |
| Bahamas            | 1996-2015          | 2020-2044           | WHO mortality database                               |
| Bahrain            | 2000-2014          | 2020-2044           | WHO mortality database                               |
| Belarus            | 1988-2012          | 2020-2044           | <i>Cancer Incidence in Five Continents (CI5plus)</i> |
| Belgium            | 1992-2016          | 2020-2044           | WHO mortality database                               |
| Belize             | 1997-2016          | 2020-2044           | WHO mortality database                               |
| Brazil             | 1994-2018          | 2020-2044           | WHO mortality database                               |
| Brunei Darussalam  | 2000-2019          | 2020-2044           | WHO mortality database                               |
| Bulgaria           | 1994-2018          | 2020-2044           | WHO mortality database                               |
| Canada             | 1993-2017          | 2020-2044           | WHO mortality database                               |
| Chile              | 1994-2018          | 2020-2044           | WHO mortality database                               |
| China              | 1988-2012          | 2020-2044           | <i>Cancer Incidence in Five Continents (CI5plus)</i> |
| Colombia           | 1993-2017          | 2020-2044           | WHO mortality database                               |
| Costa Rica         | 1993-2017          | 2020-2044           | WHO mortality database                               |
| Croatia            | 1993-2017          | 2020-2044           | WHO mortality database                               |
| Cuba               | 1993-2017          | 2020-2044           | WHO mortality database                               |
| Cyprus             | 2004-2018          | 2020-2044           | WHO mortality database                               |
| Czechia            | 1995-2019          | 2020-2044           | WHO mortality database                               |
| Denmark            | 1994-2018          | 2020-2044           | WHO mortality database                               |
| Dominican Republic | 1994-2018          | 2020-2044           | WHO mortality database                               |
| Ecuador            | 1993-2017          | 2020-2044           | WHO mortality database                               |
| Egypt              | 2000-2019          | 2020-2044           | WHO mortality database                               |
| El Salvador        | 1999-2018          | 2020-2044           | WHO mortality database                               |
| Estonia            | 1995-2019          | 2020-2044           | WHO mortality database                               |
| Finland            | 1994-2018          | 2020-2044           | WHO mortality database                               |
| France             | 1992-2016          | 2020-2044           | WHO mortality database                               |
| Germany            | 1994-2018          | 2020-2044           | WHO mortality database                               |
| Greece             | 1993-2017          | 2020-2044           | WHO mortality database                               |
| Guatemala          | 1996-2020          | 2020-2044           | WHO mortality database                               |
| Hungary            | 1995-2019          | 2020-2044           | WHO mortality database                               |
| Iceland            | 1995-2019          | 2020-2044           | WHO mortality database                               |
| India              | 1988-2012          | 2020-2044           | <i>Cancer Incidence in Five Continents (CI5plus)</i> |
| Ireland            | 1991-2015          | 2020-2044           | WHO mortality database                               |
| Israel             | 1994-2018          | 2020-2044           | WHO mortality database                               |
| Italy              | 1993-2017          | 2020-2044           | WHO mortality database                               |
| Japan              | 1994-2018          | 2020-2044           | WHO mortality database                               |
| Kazakhstan         | 1996-2020          | 2020-2044           | WHO mortality database                               |

|                                 |           |           |                                                                                  |
|---------------------------------|-----------|-----------|----------------------------------------------------------------------------------|
| <b>Korea, Republic of</b>       | 1995-2019 | 2020-2044 | WHO mortality database                                                           |
| <b>Kuwait</b>                   | 1998-2012 | 2020-2044 | <i>Cancer Incidence in Five Continents (CI5plus)</i>                             |
| <b>Kyrgyzstan</b>               | 1992-2016 | 2020-2044 | WHO mortality database                                                           |
| <b>Latvia</b>                   | 1994-2018 | 2020-2044 | WHO mortality database                                                           |
| <b>Lithuania</b>                | 1995-2019 | 2020-2044 | WHO mortality database                                                           |
| <b>Luxembourg</b>               | 1995-2019 | 2020-2044 | WHO mortality database                                                           |
| <b>Malaysia</b>                 | 2000-2014 | 2020-2044 | WHO mortality database                                                           |
| <b>Malta</b>                    | 1993-2017 | 2020-2044 | WHO mortality database                                                           |
| <b>Mauritius</b>                | 1996-2020 | 2020-2044 | WHO mortality database                                                           |
| <b>Mexico</b>                   | 1993-2017 | 2020-2044 | WHO mortality database                                                           |
| <b>The Netherlands</b>          | 1994-2018 | 2020-2044 | WHO mortality database                                                           |
| <b>New Zealand</b>              | 1992-2016 | 2020-2044 | WHO mortality database                                                           |
| <b>Nicaragua</b>                | 2000-2019 | 2020-2044 | WHO mortality database                                                           |
| <b>Norway</b>                   | 1992-2016 | 2020-2044 | WHO mortality database                                                           |
| <b>Panama</b>                   | 2000-2019 | 2020-2044 | WHO mortality database                                                           |
| <b>Paraguay</b>                 | 1995-2019 | 2020-2044 | WHO mortality database                                                           |
| <b>Peru</b>                     | 1994-2018 | 2020-2044 | WHO mortality database                                                           |
| <b>Poland</b>                   | 1994-2018 | 2020-2044 | WHO mortality database                                                           |
| <b>Portugal</b>                 | 1994-2018 | 2020-2044 | WHO mortality database                                                           |
| <b>Puerto Rico</b>              | 1993-2017 | 2020-2044 | WHO mortality database                                                           |
| <b>Romania</b>                  | 1994-2018 | 2020-2044 | WHO mortality database                                                           |
| <b>Russian Federation</b>       | 1995-2019 | 2020-2044 | WHO mortality database                                                           |
| <b>Saint Lucia</b>              | 1991-2015 | 2020-2044 | WHO mortality database                                                           |
| <b>Serbia</b>                   | 2001-2020 | 2020-2044 | WHO mortality database                                                           |
| <b>Singapore</b>                | 1993-2017 | 2020-2044 | WHO mortality database                                                           |
| <b>Slovakia</b>                 | 1995-2014 | 2020-2044 | WHO mortality database                                                           |
| <b>Slovenia</b>                 | 1995-2019 | 2020-2044 | WHO mortality database                                                           |
| <b>South Africa</b>             | 1994-2018 | 2020-2044 | WHO mortality database                                                           |
| <b>Spain</b>                    | 1993-2017 | 2020-2044 | WHO mortality database                                                           |
| <b>Suriname</b>                 | 1995-2014 | 2020-2044 | WHO mortality database                                                           |
| <b>Sweden</b>                   | 1994-2018 | 2020-2044 | WHO mortality database                                                           |
| <b>Switzerland</b>              | 1993-2017 | 2020-2044 | WHO mortality database                                                           |
| <b>Trinidad and Tobago</b>      | 1988-2012 | 2020-2044 | WHO mortality database                                                           |
| <b>Thailand</b>                 | 1993-2012 | 2020-2044 | <i>Cancer Incidence in Five Continents (CI5plus)</i>                             |
| <b>Turkey</b>                   | 1998-2012 | 2020-2044 | <i>Cancer Incidence in Five Continents (CI5plus)</i>                             |
| <b>Turkmenistan</b>             | 1991-2015 | 2020-2044 | WHO mortality database                                                           |
| <b>Uganda</b>                   | 1991-2015 | 2020-2044 | <i>Cancer Incidence in Five Continents (CI5plus)</i> and Kampala Registry Cancer |
| <b>Ukraine</b>                  | 1995-2009 | 2020-2044 | WHO mortality database                                                           |
| <b>United Kingdom</b>           | 1992-2016 | 2020-2044 | WHO mortality database                                                           |
| <b>United States of America</b> | 1993-2017 | 2020-2044 | WHO mortality database                                                           |
| <b>Uruguay</b>                  | 1993-2017 | 2020-2044 | WHO mortality database                                                           |

**Appendix 2. Estimated lung cancer mortality rate in 2022 (by period) and in the birth cohort studied (for those born in 2006-2010)**

The following figures show age-standardised lung cancer mortality rates in 2022 in the world regions (rate by period) and the age-standardised lung cancer mortality rate in the cohort analysed (rate among cohort born in 2006-2010, who were at the age of smoking initiation in 2022, and therefore targeted by the tobacco-free generation), for both sexes combined (2.1), men (2.2) and women (2.3).

**Supplementary Figure 2.1. Lung cancer mortality rate by period and in the birth cohort using data from GLOBOCAN 2022, by world region.**

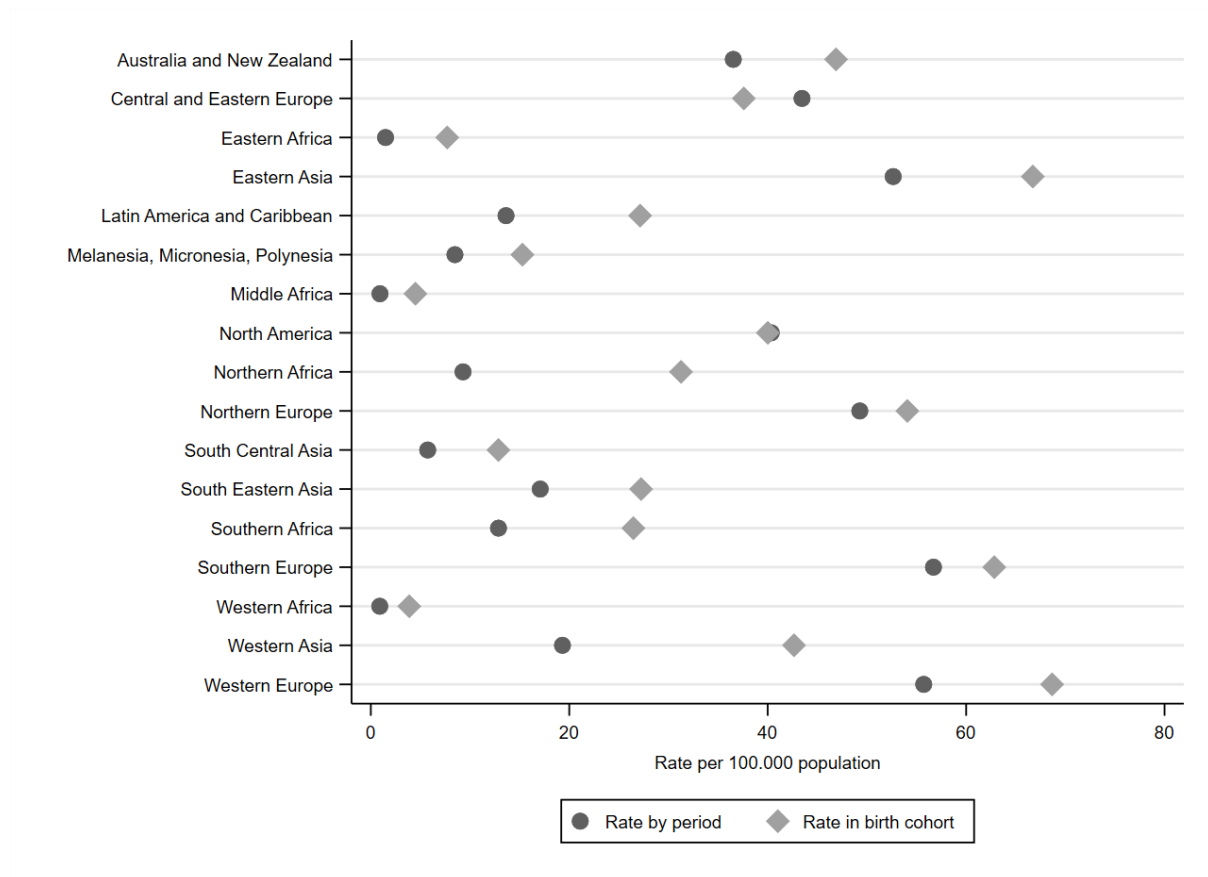

**Supplementary Figure 2.2. Lung cancer mortality rate by period and in the birth cohort in men using data from GLOBOCAN 2022, by world region.**

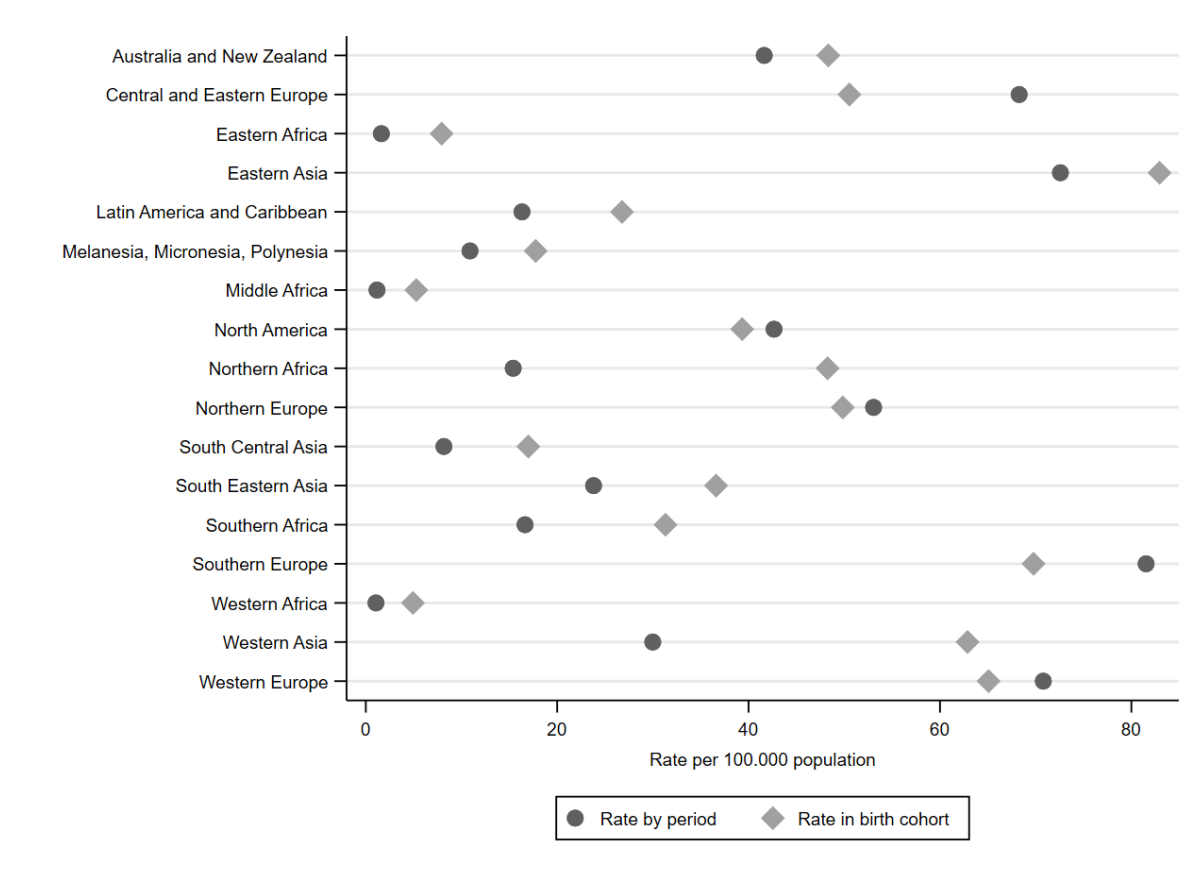

Supplementary Figure 2.3. Lung cancer mortality rate by period and in the birth cohort in women using data from GLOBOCAN 2022, by world region.

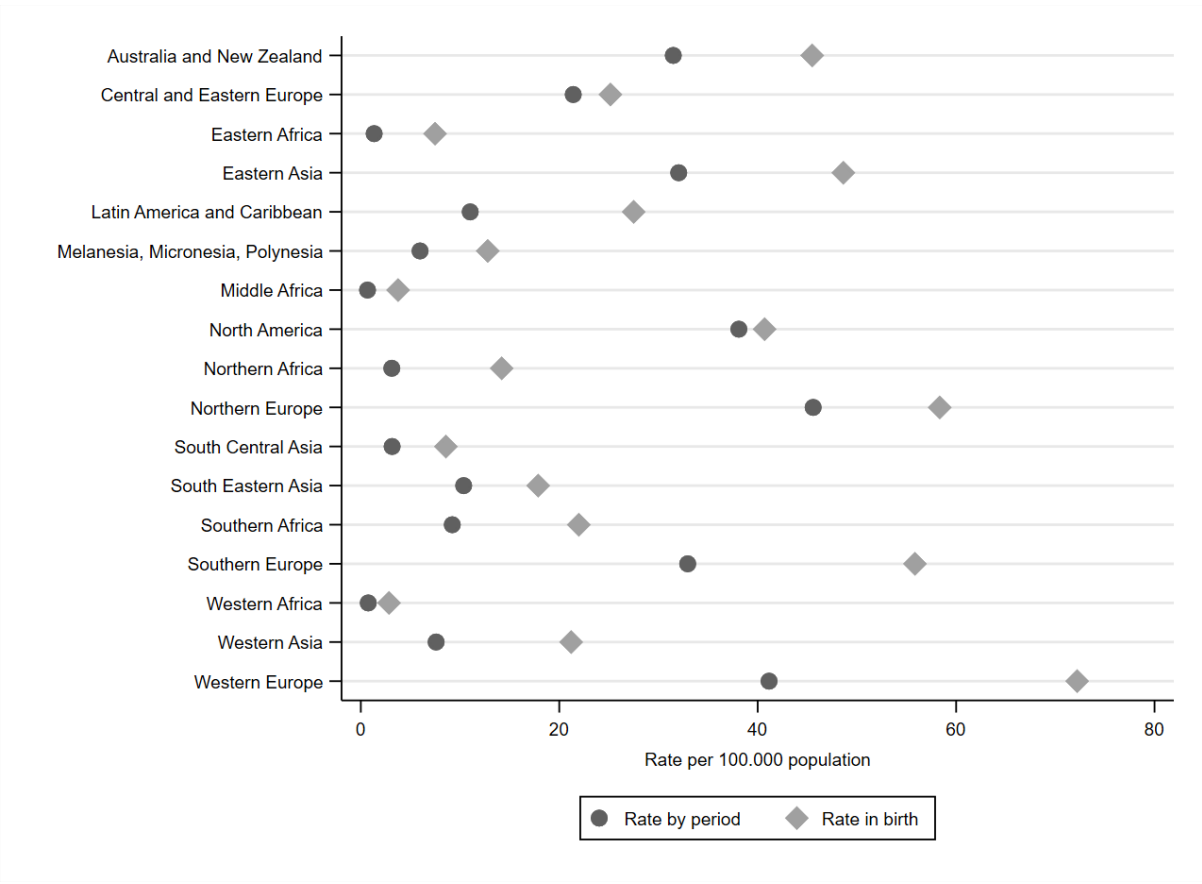



### **Appendix 3. Period/cohort ratio estimation**

#### Ratio selection to convert period rates to cohort rates

Lung cancer mortality rates were obtained from the GLOBOCAN 2022 database<sup>2</sup> by sex for each of the 185 countries included. Countries were ordered from lowest lung cancer mortality rate to highest rate by sex and categorised according to bands of 5 deaths per 100,000. Thus, for example, the first group included countries with lung cancer mortality rates between 0 and 4.9, the second group included countries with rates between 5.0 and 9.9, and so on. Once the groups were created, the 82 countries with period to cohort rate ratios were located. For the 82 countries, their own ratio was used. For the remaining countries that did not have period to cohort rate ratios (103 out of 185 countries), the decision of which ratio to use was based on using the ratio of those countries that were located in the same geographical region and were also in the same lung cancer mortality rate division group. In some cases, the criterion of being in the same region prevailed over the criterion of having similar lung cancer mortality rates in 2022 (GLOBOCAN data).<sup>2</sup> Thus, when countries from the same region were not located in a group, the ratios of the countries from the same region in the previous group were used. In addition, when there was more than one country from the same geographic region in the same group, an average of the ratios of those countries was used. Table 3.1 shows the sources of the period to cohort rate ratios that were used for each of the 185 countries.

#### Limit application on ratios

After calculating the period to cohort rate ratios for each of the age groups, a limit was applied to those ratios that were  $\geq 5$  to limit the influence of extremely low rates which produced high ratios, since this could distort the cohort estimates, especially in women. In those age groups where the calculated ratio was  $\geq 5$  this ratio was replaced by the ratio of the previous age group. In those cases, in which the previous age group also had a ratio  $\geq 5$ , the ratio of the preceding group was applied for both. Thus, for example, if the 10-14 age group had a ratio of 7 and the 5-9 age group had a ratio of 6, the ratio of the 0-4 age group that had a ratio of less than 5 was applied.

**Supplementary Table 3.1. Countries included and the reference countries for the period to cohort rate ratios by sex.**

| <b>MEN</b>                    |                                | <b>WOMEN</b>                  |                                     |
|-------------------------------|--------------------------------|-------------------------------|-------------------------------------|
| <b>Country</b>                | <b>Country ratio selection</b> | <b>Country</b>                | <b>Country ratio selection</b>      |
| Niger                         | Uganda                         | Sierra Leone                  | Average of Uganda, Mauritius, Egypt |
| Nigeria                       | Uganda                         | Niger                         | Average of Uganda, Mauritius, Egypt |
| Congo, Republic of            | Uganda                         | Chad                          | Average of Uganda, Mauritius, Egypt |
| Cape Verde                    | Uganda                         | Mozambique                    | Average of Uganda, Mauritius        |
| Benin                         | Uganda                         | Congo, Republic of            | Average of Uganda, Mauritius, Egypt |
| Malawi                        | Uganda                         | Togo                          | Average of Uganda, Mauritius, Egypt |
| South Sudan                   | Uganda                         | The Republic of the Gambia    | Average of Uganda, Mauritius, Egypt |
| Mozambique                    | Uganda                         | Malawi                        | Average of Uganda, Mauritius        |
| Tanzania, United Republic of  | Uganda                         | Benin                         | Average of Uganda, Mauritius, Egypt |
| Central African Republic      | Uganda                         | Mauritania                    | Average of Uganda, Mauritius, Egypt |
| Comoros                       | Uganda                         | Comoros                       | Average of Uganda, Mauritius        |
| Congo, Democratic Republic of | Uganda                         | Côte d'Ivoire                 | Average of Uganda, Mauritius, Egypt |
| Madagascar                    | Uganda                         | Guinea-Bissau                 | Average of Uganda, Mauritius, Egypt |
| Sierra Leone                  | Uganda                         | Rwanda                        | Average of Uganda, Mauritius        |
| Mauritania                    | Uganda                         | Senegal                       | Average of Uganda, Mauritius, Egypt |
| Equatorial Guinea             | Uganda                         | Cape Verde                    | Average of Uganda, Mauritius, Egypt |
| Togo                          | Uganda                         | Madagascar                    | Average of Uganda, Mauritius        |
| Sudan                         | Uganda                         | Angola                        | Average of Uganda, Mauritius, Egypt |
| Angola                        | Uganda                         | Congo, Democratic Republic of | Average of Uganda, Mauritius, Egypt |
| Burkina Faso                  | Uganda                         | Liberia                       | Average of Uganda, Mauritius, Egypt |
| Eritrea                       | Uganda                         | Nigeria                       | Average of Uganda, Mauritius, Egypt |
| Gabon                         | Uganda                         | Central African Republic      | Average of Uganda, Mauritius, Egypt |
| Ghana                         | Uganda                         | South Sudan                   | Average of Uganda, Mauritius        |
| Guinea-Bissau                 | Uganda                         | Botswana                      | Average of Uganda, Mauritius, Egypt |
| <b>Uganda</b>                 | Uganda                         | Sudan                         | Egypt                               |
| Côte d'Ivoire                 | Uganda                         | Djibouti                      | Average of Uganda, Mauritius        |
| Djibouti                      | Uganda                         | Guinea                        | Average of Uganda, Mauritius, Egypt |
| Kenya                         | Uganda                         | Cameroon                      | Average of Uganda, Mauritius, Egypt |
| Chad                          | Uganda                         | Ghana                         | Average of Uganda, Mauritius, Egypt |
| Somalia                       | Uganda                         | Zambia                        | Average of Uganda, Mauritius        |
| Ethiopia                      | Uganda                         | Tanzania, United Republic of  | Average of Uganda, Mauritius        |
| Liberia                       | Uganda                         | Mali                          | Average of Uganda, Mauritius, Egypt |

|                            |                                                                 |                     |                                                                                                                                                   |
|----------------------------|-----------------------------------------------------------------|---------------------|---------------------------------------------------------------------------------------------------------------------------------------------------|
| Senegal                    | Uganda                                                          | Pakistan            | Average of Turkmenistan, India, Kazakhstan                                                                                                        |
| Burundi                    | Uganda                                                          | Saudi Arabia        | Average of Kuwait, Azerbaijan                                                                                                                     |
| Rwanda                     | Uganda                                                          | <b>Uganda</b>       | Uganda                                                                                                                                            |
| Cameroon                   | Uganda                                                          | Eswatini            | Average of Uganda, Mauritius, Egypt                                                                                                               |
| <b>Guatemala</b>           | Guatemala                                                       | Guyana              | Average of Saint Lucia, Guatemala, Costa Rica, Panama, Mexico, El Salvador, Bahamas, Paraguay, Nicaragua, Trinidad and Tobago and Tobago, Ecuador |
| Zambia                     | Uganda                                                          | Equatorial Guinea   | Average of Uganda, Mauritius, Egypt                                                                                                               |
| Mali                       | Uganda                                                          | Burundi             | Average of Uganda, Mauritius                                                                                                                      |
| Lesotho                    | Uganda                                                          | Eritrea             | Average of Uganda, Mauritius                                                                                                                      |
| <b>El Salvador</b>         | El Salvador                                                     | Gabon               | Average of Uganda, Mauritius, Egypt                                                                                                               |
| Yemen                      | Kuwait                                                          | Oman                | Average of Kuwait, Azerbaijan                                                                                                                     |
| Saudi Arabia               | Kuwait                                                          | <b>India</b>        | India                                                                                                                                             |
| Guinea                     | Uganda                                                          | Algeria             | Egypt                                                                                                                                             |
| Haiti                      | Average of Ecuador, Peru, Costa Rica, Nicaragua, Mexico, Panama | Sri Lanka           | Average of Turkmenistan, India, Kazakhstan                                                                                                        |
| Honduras                   | Average of Ecuador, Peru, Costa Rica, Nicaragua, Mexico, Panama | <b>Guatemala</b>    | Guatemala                                                                                                                                         |
| Guyana                     | Average of Ecuador, Peru, Costa Rica, Nicaragua, Mexico, Panama | Kenya               | Average of Uganda, Mauritius                                                                                                                      |
| Qatar                      | Kuwait                                                          | Libya               | Egypt                                                                                                                                             |
| United Arab Emirates       | Kuwait                                                          | <b>Saint Lucia</b>  | Saint Lucia                                                                                                                                       |
| Botswana                   | Uganda                                                          | Somalia             | Average of Uganda, Mauritius                                                                                                                      |
| <b>Ecuador</b>             | Ecuador                                                         | Yemen               | Average of Kuwait, Azerbaijan                                                                                                                     |
| <b>Peru</b>                | Peru                                                            | Solomon Islands     | Australia                                                                                                                                         |
| Tajikistan                 | India                                                           | Iraq                | Average of Kuwait, Azerbaijan                                                                                                                     |
| Bhutan                     | India                                                           | Lesotho             | Average of Uganda, Mauritius, Egypt                                                                                                               |
| Oman                       | Kuwait                                                          | Vanuatu             | Australia                                                                                                                                         |
| <b>Costa Rica</b>          | Costa Rica                                                      | Ethiopia            | Average of Uganda, Mauritius                                                                                                                      |
| <b>Nicaragua</b>           | Nicaragua                                                       | <b>Costa Rica</b>   | Costa Rica                                                                                                                                        |
| <b>Mexico</b>              | Mexico                                                          | Afghanistan         | Average of Turkmenistan, India, Kazakhstan                                                                                                        |
| <b>Kuwait</b>              | Kuwait                                                          | <b>Panama</b>       | Panama                                                                                                                                            |
| <b>Panama</b>              | Panama                                                          | Uzbekistan          | Average of Turkmenistan, India, Kazakhstan                                                                                                        |
| Solomon Islands            | Australia                                                       | Tajikistan          | Average of Turkmenistan, India, Kazakhstan                                                                                                        |
| Eswatini                   | Uganda                                                          | Zimbabwe            | Average of Uganda, Mauritius                                                                                                                      |
| <b>India</b>               | India                                                           | <b>Mexico</b>       | Mexico                                                                                                                                            |
| Namibia                    | Uganda                                                          | Morocco             | Egypt                                                                                                                                             |
| Pakistan                   | India                                                           | Bangladesh          | Average of Turkmenistan, India, Kazakhstan                                                                                                        |
| Zimbabwe                   | Uganda                                                          | <b>El Salvador</b>  | El Salvador                                                                                                                                       |
| Fiji                       | Australia                                                       | <b>Kuwait</b>       | Kuwait                                                                                                                                            |
| The Republic of the Gambia | Uganda                                                          | <b>Turkmenistan</b> | Turkmenistan                                                                                                                                      |

|                            |                                                                                    |                            |                                                                                                                                        |
|----------------------------|------------------------------------------------------------------------------------|----------------------------|----------------------------------------------------------------------------------------------------------------------------------------|
| Bolivia                    | Average of Ecuador, Peru, Costa Rica, Nicaragua, Mexico, Panama                    | <b>Bahamas</b>             | Bahamas                                                                                                                                |
| Barbados                   | Average of Puerto Rico, Bahamas, Colombia, Belize, Dominican Republic, Saint Lucia | <b>Paraguay</b>            | Paraguay                                                                                                                               |
| Afghanistan                | India                                                                              | <b>Nicaragua</b>           | Nicaragua                                                                                                                              |
| Sri Lanka                  | India                                                                              | Tunisia                    | Egypt                                                                                                                                  |
| <b>Puerto Rico</b>         | Puerto Rico                                                                        | <b>Belarus</b>             | Belarus                                                                                                                                |
| <b>Bahamas</b>             | Bahamas                                                                            | <b>Egypt</b>               | Egypt                                                                                                                                  |
| <b>Colombia</b>            | Colombia                                                                           | Georgia                    | Average of Kuwait, Azerbaijan                                                                                                          |
| Uzbekistan                 | India                                                                              | <b>Belize</b>              | Belize                                                                                                                                 |
| <b>Mauritius</b>           | Mauritius                                                                          | Namibia                    | Average of Uganda, Mauritius, Egypt                                                                                                    |
| France, Martinique         | Average of Puerto Rico, Bahamas, Colombia, Belize, Dominican Republic, Saint Lucia | <b>Kazakhstan</b>          | Kazakhstan                                                                                                                             |
| Nepal                      | India                                                                              | <b>Trinidad and Tobago</b> | Trinidad and Tobago                                                                                                                    |
| Vanuatu                    | Australia                                                                          | <b>Azerbaijan</b>          | Azerbaijan                                                                                                                             |
| <b>Belize</b>              | Belize                                                                             | Burkina Faso               | Average of Uganda, Mauritius, Egypt                                                                                                    |
| Papua New Guinea           | Australia                                                                          | United Arab Emirates       | Average of Kuwait, Azerbaijan                                                                                                          |
| Bangladesh                 | India                                                                              | <b>Mauritius</b>           | Mauritius                                                                                                                              |
| <b>Egypt</b>               | Egypt                                                                              | Honduras                   | Average of Saint Lucia, Guatemala, Costa Rica, Panama, Mexico, El Salvador, Bahamas, Paraguay, Nicaragua, Trinidad and Tobago          |
| <b>Dominican Republic</b>  | Dominican Republic                                                                 | Fiji                       | Australia                                                                                                                              |
| <b>Bahrain</b>             | Bahrain                                                                            | Qatar                      | Average of Kuwait, Azerbaijan                                                                                                          |
| <b>Sweden</b>              | Sweden                                                                             | <b>Ukraine</b>             | Ukraine                                                                                                                                |
| Timor-Leste                | India                                                                              | <b>Bahrain</b>             | Bahrain                                                                                                                                |
| <b>Saint Lucia</b>         | Saint Lucia                                                                        | Jordan                     | Average of Kuwait, Azerbaijan                                                                                                          |
| Iran, Islamic Republic of  | Bahrain                                                                            | <b>Ecuador</b>             | Ecuador                                                                                                                                |
| <b>Chile</b>               | Chile                                                                              | France, Martinique         | Average of Saint Lucia, Guatemala, Costa Rica, Panama, Mexico, El Salvador, Bahamas, Paraguay, Nicaragua, Trinidad and Tobago, Ecuador |
| <b>Turkmenistan</b>        | Turkmenistan                                                                       | Bolivia                    | Average of Puerto Rico, Peru, Colombia, Chile, Dominican Republic, Argentina, Brazil, Suriname                                         |
| <b>Trinidad and Tobago</b> | Trinidad and Tobago                                                                | <b>Puerto Rico</b>         | Puerto Rico                                                                                                                            |
| <b>Brazil</b>              | Brazil                                                                             | Barbados                   | Average of Puerto Rico, Peru, Colombia, Chile, Dominican Republic, Argentina, Brazil, Suriname                                         |
| <b>Iceland</b>             | Iceland                                                                            | <b>Kyrgyzstan</b>          | Kyrgyzstan                                                                                                                             |
| Sao Tome and Principe      | Average of Egypt, Mauritius                                                        | Mongolia                   | Average of Japan, Republic of Korea                                                                                                    |
| Jamaica                    | Average of Chile, Brazil, Trinidad and Tobago, Paraguay                            | Timor-Leste                | Average of Thailand, Malaysia                                                                                                          |
| France, Guadeloupe         | Average of Chile, Brazil, Trinidad and Tobago, Paraguay                            | Haiti                      | Average of Puerto Rico, Peru, Colombia, Chile, Dominican Republic, Argentina, Brazil, Suriname                                         |
| Maldives                   | Turkmenistan                                                                       | Indonesia                  | Average of Thailand, Malaysia                                                                                                          |
| Venezuela                  | Average of Chile, Brazil, Trinidad and Tobago, Paraguay                            | Nepal                      | Kyrgyzstan                                                                                                                             |

|                                  |                                                         |                                  |                                                                                                |
|----------------------------------|---------------------------------------------------------|----------------------------------|------------------------------------------------------------------------------------------------|
| Algeria                          | Egypt                                                   | France, Guadeloupe               | Average of Puerto Rico, Peru, Colombia, Chile, Dominican Republic, Argentina, Brazil, Suriname |
| <b>Paraguay</b>                  | Paraguay                                                | <b>Malaysia</b>                  | Malaysia                                                                                       |
| <b>Australia</b>                 | Australia                                               | Republic of Moldova              | Average of Latvia, Lithuania, Estonia, Malta, Albania                                          |
| <b>Israel</b>                    | Israel                                                  | <b>Russian Federation</b>        | Russian Federation                                                                             |
| <b>Norway</b>                    | Norway                                                  | Maldives                         | Kyrgyzstan                                                                                     |
| Indonesia                        | Turkmenistan                                            | <b>Peru</b>                      | Peru                                                                                           |
| <b>United States of America</b>  | United States of America                                | Palestine                        | Israel                                                                                         |
| <b>Switzerland</b>               | Switzerland                                             | French Guiana                    | Average of Puerto Rico, Peru, Colombia, Chile, Dominican Republic, Argentina, Brazil, Suriname |
| <b>Finland</b>                   | Finland                                                 | <b>Colombia</b>                  | Colombia                                                                                       |
| French Guiana                    | Average of Chile, Brazil, Trinidad and Tobago, Paraguay | <b>Korea, Republic of</b>        | Korea, Republic of                                                                             |
| Myanmar                          | Turkmenistan                                            | <b>Latvia</b>                    | Latvia                                                                                         |
| <b>Kyrgyzstan</b>                | Kyrgyzstan                                              | Iran, Islamic Republic of        | Kyrgyzstan                                                                                     |
| <b>Suriname</b>                  | Suriname                                                | <b>Japan</b>                     | Japan                                                                                          |
| <b>Malaysia</b>                  | Malaysia                                                | Papua New Guinea                 | Australia                                                                                      |
| Cambodia                         | Average of Malaysia, Thailand, Brunei Darussalam        | <b>Lithuania</b>                 | Lithuania                                                                                      |
| <b>Ireland</b>                   | Ireland                                                 | France, La Réunion               | Israel                                                                                         |
| <b>Thailand</b>                  | Thailand                                                | Armenia                          | Israel                                                                                         |
| <b>New Zealand</b>               | New Zealand                                             | Bhutan                           | Kyrgyzstan                                                                                     |
| Iraq                             | Kyrgyzstan                                              | <b>Estonia</b>                   | Estonia                                                                                        |
| <b>United Kingdom</b>            | United Kingdom                                          | Jamaica                          | Average of Puerto Rico, Peru, Colombia, Chile, Dominican Republic, Argentina, Brazil, Suriname |
| <b>Malta</b>                     | Malta                                                   | Lao People's Democratic Republic | Average of Thailand, Malaysia                                                                  |
| Jordan                           | Kyrgyzstan                                              | Syrian Arab Republic             | Israel                                                                                         |
| <b>Japan</b>                     | Japan                                                   | <b>Chile</b>                     | Chile                                                                                          |
| Lebanon                          | Kyrgyzstan                                              | <b>Suriname</b>                  | Suriname                                                                                       |
| <b>Brunei Darussalam</b>         | Brunei Darussalam                                       | <b>Malta</b>                     | Malta                                                                                          |
| <b>Argentina</b>                 | Argentina                                               | Cambodia                         | Average of Thailand, Malaysia                                                                  |
| <b>Austria</b>                   | Austria                                                 | <b>Portugal</b>                  | Portugal                                                                                       |
| Lao People's Democratic Republic | Average of Malaysia, Thailand, Brunei Darussalam        | <b>Israel</b>                    | Israel                                                                                         |
| <b>Canada</b>                    | Canada                                                  | <b>Dominican Republic</b>        | Dominican Republic                                                                             |
| <b>Luxembourg</b>                | Luxembourg                                              | Sao Tome and Principe            | Average of Uganda, Mauritius, Egypt                                                            |
| <b>South Africa</b>              | South Africa                                            | <b>Finland</b>                   | Finland                                                                                        |
| <b>Denmark</b>                   | Denmark                                                 | <b>Albania</b>                   | Albania                                                                                        |
| <b>Italy</b>                     | Italy                                                   | <b>Thailand</b>                  | Thailand                                                                                       |
| <b>The Netherlands</b>           | The Netherlands                                         | <b>Argentina</b>                 | Argentina                                                                                      |
| <b>Czechia</b>                   | Czechia                                                 | <b>Brazil</b>                    | Brazil                                                                                         |

|                               |                                                                           |                                 |                                               |
|-------------------------------|---------------------------------------------------------------------------|---------------------------------|-----------------------------------------------|
| <b>Germany</b>                | Germany                                                                   | Viet Nam                        | Singapore                                     |
| Syrian Arab Republic          | Azerbaijan                                                                | <b>Turkey</b>                   | Turkey                                        |
| <b>Belgium</b>                | Belgium                                                                   | <b>Slovakia</b>                 | Slovakia                                      |
| Viet Nam                      | Singapore                                                                 | Venezuela                       | Uruguay                                       |
| Libya                         | Egypt                                                                     | <b>South Africa</b>             | South Africa                                  |
| <b>Korea, Republic of</b>     | Korea, Republic of                                                        | <b>Spain</b>                    | Spain                                         |
| <b>Portugal</b>               | Portugal                                                                  | <b>Cyprus</b>                   | Cyprus                                        |
| France, La Réunion            | France                                                                    | <b>Bulgaria</b>                 | Bulgaria                                      |
| <b>Azerbaijan</b>             | Azerbaijan                                                                | Myanmar                         | Singapore                                     |
| <b>Cuba</b>                   | Cuba                                                                      | <b>Greece</b>                   | Greece                                        |
| <b>Slovakia</b>               | Slovakia                                                                  | Philippines                     | Singapore                                     |
| Mongolia                      | Average of Kazakhstan, Azerbaijan                                         | <b>Italy</b>                    | Italy                                         |
| <b>Spain</b>                  | Spain                                                                     | <b>Romania</b>                  | Romania                                       |
| <b>Singapore</b>              | Singapore                                                                 | Bosnia and Herzegovina          | Average of Slovakia, Bulgaria, Czechia        |
| <b>Slovenia</b>               | Slovenia                                                                  | North Macedonia                 | Average of Slovakia, Bulgaria, Czechia        |
| Palestine                     | Average of Kazakhstan, Azerbaijan                                         | <b>Uruguay</b>                  | Uruguay                                       |
| Philippines                   | Singapore                                                                 | Lebanon                         | Israel                                        |
| Tunisia                       | Egypt                                                                     | <b>Australia</b>                | Australia                                     |
| <b>Kazakhstan</b>             | Kazakhstan                                                                | <b>Switzerland</b>              | Switzerland                                   |
| Morocco                       | Egypt                                                                     | <b>Singapore</b>                | Singapore                                     |
| <b>France</b>                 | France                                                                    | <b>Czechia</b>                  | Czechia                                       |
| <b>Ukraine</b>                | Ukraine                                                                   | <b>Sweden</b>                   | Sweden                                        |
| <b>Cyprus</b>                 | Cyprus                                                                    | Samoa                           | Australia                                     |
| Republic of Moldova           | Average of Bulgaria, Ukraine, Cyprus, Estonia, Lithuania, Latvia, Albania | <b>China</b>                    | China                                         |
| <b>Bulgaria</b>               | Bulgaria                                                                  | <b>United States of America</b> | United States of America                      |
| Samoa                         | Australia                                                                 | <b>France</b>                   | France                                        |
| Georgia                       | Average of Kazakhstan, Azerbaijan                                         | <b>Iceland</b>                  | Iceland                                       |
| <b>Estonia</b>                | Estonia                                                                   | <b>Austria</b>                  | Austria                                       |
| <b>Lithuania</b>              | Lithuania                                                                 | Montenegro                      | Average of Austria, Croatia, Slovenia, Serbia |
| <b>Russian Federation</b>     | Russian Federation                                                        | <b>Belgium</b>                  | Belgium                                       |
| <b>Latvia</b>                 | Latvia                                                                    | <b>Germany</b>                  | Germany                                       |
| <b>China</b>                  | China                                                                     | <b>Croatia</b>                  | Croatia                                       |
| <b>Albania</b>                | Albania                                                                   | <b>Luxembourg</b>               | Luxembourg                                    |
| <b>Greece</b>                 | Greece                                                                    | <b>Norway</b>                   | Norway                                        |
| <b>Uruguay</b>                | Uruguay                                                                   | <b>United Kingdom</b>           | United Kingdom                                |
| Korea, Democratic Republic of | China                                                                     | <b>Ireland</b>                  | Ireland                                       |
| North Macedonia               | Average of Greece, Romania, Poland                                        | <b>New Zealand</b>              | New Zealand                                   |
| <b>Romania</b>                | Romania                                                                   | Guam                            | New Zealand                                   |
| Guam                          | Australia                                                                 | <b>Cuba</b>                     | Cuba                                          |
| France, New Caledonia         | Australia                                                                 | French Polynesia                | New Zealand                                   |
| <b>Poland</b>                 | Poland                                                                    | New Caledonia                   | New Zealand                                   |
| <b>Croatia</b>                | Croatia                                                                   | <b>Brunei Darussalam</b>        | Brunei Darussalam                             |

|                        |                                     |                               |                 |
|------------------------|-------------------------------------|-------------------------------|-----------------|
| Bosnia and Herzegovina | Average of Belarus, Serbia, Croatia | <b>Slovenia</b>               | Slovenia        |
| <b>Belarus</b>         | Belarus                             | <b>Canada</b>                 | Canada          |
| Armenia                | Average of Kazakhstan, Azerbaijan   | <b>Poland</b>                 | Poland          |
| Montenegro             | Average of Belarus, Serbia, Croatia | <b>Serbia</b>                 | Serbia          |
| <b>Serbia</b>          | Serbia                              | <b>The Netherlands</b>        | The Netherlands |
| French Polynesia       | Australia                           | <b>Denmark</b>                | Denmark         |
| <b>Hungary</b>         | Hungary                             | Korea, Democratic Republic of | China           |
| <b>Turkey</b>          | Turkey                              | <b>Hungary</b>                | Hungary         |

Countries marked in bold had their own lung cancer predictions and thus utilised its own period to cohort rate ratio. The countries are ordered from lowest to highest lung cancer mortality rate according to GLOBOCAN 2022 data.

#### **Appendix 4. Lung cancer mortality rates in never-smokers**

We used lung cancer mortality rates in never-smokers from the Cancer Prevention Study phase II (CPS-II) with follow-up from 1982-2003, from the Korean Cancer Prevention Study (KCPS) with follow-up from 1992-2004 and from the average rates of lung cancer incidence in the low-smoking prevalence population of women in four cancer registries in China (Qidong city, Shanghai, Tianjin and Hong Kong) 1983-1987. All rates were extracted from the article entitled "Lung Cancer Occurrence in Never-Smokers: An Analysis of 13 Cohorts and 22 Cancer Registry Studies" published by Thun et al.<sup>3</sup>

##### Cancer Prevention Study phase II

Lung cancer mortality rates in never smokers from the CPS-II were used in the following countries for both men and women: Albania, Australia, Austria, Belarus, Belgium, Bosnia and Herzegovina, Bulgaria, Canada, Croatia, Cyprus, Czechia, Denmark, Estonia, Fiji, Finland, France, France New Caledonia, French Polynesia, Germany, Guam, Hungary, Iceland, Ireland, Italy, Latvia, Lithuania, Luxembourg, Malta, Republic of Moldova, Montenegro, New Zealand, North Macedonia, Norway, Papua New Guinea, Poland, Portugal, Romania, Russian Federation, Samoa, Serbia, Slovakia, Slovenia, Solomon Islands, Spain, Sweden, Switzerland, The Netherlands, Ukraine, United Kingdom, United States of America and Vanuatu.

##### Korean Cancer Prevention Study

Lung cancer mortality rates in never smokers from the KCPS were used in the following countries for both men and women: Afghanistan, Algeria, Angola, Argentina, Armenia, Azerbaijan, Bahamas, Bahrain, Bangladesh, Barbados, Belize, Benin, Bhutan, Plurinational State of Bolivia, Botswana, Brazil, Brunei Darussalam, Burkina Fasso, Burundi, Cambodia, Cameroon, Cape Verde, Central African Republic, Chad, Chile, Colombia, Comoros, Democratic Republic of Congo, Republic of Congo, Costa Rica, Côte d'Ivoire, Cuba, Djibouti, Ecuador, Egypt, El Salvador, Equatorial Guinea, Eritrea, Eswatini, Ethiopia, France Guadeloupe, France La Réunion, France Martinique, French Guiana, Gabon, Gaza Strip and West Bank, Georgia, Ghana, Guatemala, Guinea, Guinea-Bissau, Guyana, Haiti, Honduras, India, Indonesia, Islamic Republic of Iran, Iraq, Israel, Jamaica, Japan, Jordan, Kazakhstan, Kenya, Republic of Korea, Kuwait, Kyrgyzstan, Lao People's Democratic Republic, Lebanon, Lesotho, Liberia, Libya, Madagascar, Malawi, Malaysia, Maldives, Mali, Mauritania, Mauritius, Mexico, Mongolia, Morocco, Mozambique, Myanmar, Namibia, Nepal, Nicaragua, Niger, Nigeria, Oman, Pakistan, Panama, Paraguay, Peru, Philippines, Puerto Rico, Qatar, Rwanda, Saint Lucia, Sao Tome and Principe, Saudi Arabia, Senegal, Sierra Leone, Singapore, Somalia, South Africa, South Sudan, Sri Lanka, Sudan, Suriname, Syrian Arab Republic, Tajikistan, United Republic of Tanzania, Thailand, The Republic of the Gambia, Timor-Leste, Togo, Trinidad and Tobago, Tunisia, Turkey, Turkmenistan, Uganda, United Arab Emirates, Uruguay, Uzbekistan, Bolivarian Republic of Venezuela, Viet Nam, Yemen, Zambia and Zimbabwe. In China and the Democratic Republic of Korea these rates were only used for men.



### Cancer Incidence in Five Continents

The average lung cancer incidence rates in women in Qidong city, Shanghai, Tianjin and Hong Kong was used for women in the following countries: China and Democratic Republic of Korea.

The rates in never smokers used are presented below.

**Supplementary Table 4.1. Lung cancer mortality rates in never smokers from the Cancer Prevention Study phase II (CPS-II), the Korean Cancer Prevention Study (KCPS) and four cancer registries in China by sex and age group.**

| Age group | CPS-II |       | KCPS  |       | C15 (four registries in China) |
|-----------|--------|-------|-------|-------|--------------------------------|
|           | Men    | Women | Men   | Women | Women                          |
| 0-4       | 0      | 0     | 0     | 0     | 0                              |
| 5-9       | 0      | 0     | 0     | 0     | 0                              |
| 10-14     | 0      | 0     | 0     | 0     | 0                              |
| 15-19     | 0      | 0     | 0     | 0     | 0                              |
| 20-24     | 0      | 0     | 0     | 0     | 0.6                            |
| 25-29     | 0      | 0     | 0     | 0     | 1.3                            |
| 30-34     | 0      | 0     | 0     | 0.7   | 2.2                            |
| 35-39     | 4.0    | 1.9   | 1.3   | 2.3   | 4.5                            |
| 40-44     | 2.4    | 0.0   | 2.3   | 3.2   | 10.8                           |
| 45-49     | 5.0    | 2.1   | 6.5   | 5.2   | 19.7                           |
| 50-54     | 5.1    | 6.3   | 9.9   | 9.2   | 37.7                           |
| 55-59     | 7.4    | 8.1   | 19.2  | 12.4  | 65.3                           |
| 60-64     | 14.3   | 13.2  | 29.2  | 21.9  | 112.0                          |
| 65-69     | 18.6   | 18.0  | 56.9  | 31.6  | 156.8                          |
| 70-74     | 33.1   | 27.9  | 96.5  | 41.2  | 195.3                          |
| 75-79     | 46.5   | 35.6  | 141.4 | 59.7  | 194.1                          |
| 80-84     | 80.4   | 54.3  | 159.2 | 89.8  | 200.7                          |
| 85+       | 127.4  | 73.0  | 159.2 | 89.8  | 164.8                          |

C15: Cancer Incidence in Five Continents

Because in some countries, such as Spain, lung cancer incidence rates and smoking prevalence in women were lower than in the US, an additional analysis was conducted to assess if the results presented were robust. We assessed whether the results obtained for women in Spain differed when we used the lung cancer mortality rates in never smokers from the CPS-II (study carried out in the United States population) and lung cancer incidence rates for women in the Basque Country (North of Spain) – a population with low smoking prevalence and low risk of lung cancer. We extracted both sets of rates from the study by Thun et al.<sup>3</sup> Data from Basque Country (Spain) were from a population-based cancer registry in the region.

The resulting number of prevented deaths, the corresponding PIFs and ASRs did not differ greatly when using the external rates (CPS-II, as in our main results) or the internal rates (Spanish, as in this analysis). The PIF increased by less than 10 percentage points when using low-risk lung cancer data from the Spanish population, while the ASR of prevented deaths was very similar independent of the data used.

**Supplementary Table 4.2. Application of lung cancer rates from different sources.**

| <b>NS rate source</b> | <b>Expected deaths</b> | <b>Prevented deaths</b> | <b>PIF</b> | <b>ASR expected deaths</b> | <b>ASR prevented deaths</b> |
|-----------------------|------------------------|-------------------------|------------|----------------------------|-----------------------------|
| <b>CPS-II</b>         | 14100                  | 10300                   | 73.1       | 15.8                       | 12.4                        |
| <b>CI5</b>            | 14100                  | 11500                   | 81.9       | 15.8                       | 12.2                        |

ASR: age-standardised rates, CI5: Cancer Incidence in Five Continents, CPS-II: Cancer Prevention Study-II, NS: never-smokers, PIF: population impact fraction

## Appendix 5. Population impact fraction

The population impact fraction (PIF) measures the proportional change in lung cancer mortality from a change in tobacco use due to the implementation of the tobacco-free generation strategy.<sup>4</sup> In this study, PIF is interpreted as the percentage of lung cancer deaths that would be avoided by preventing the generation born between 2006-2010 from taking up tobacco smoking. To calculate it, two parameters are needed namely: the number of lung cancer deaths expected to occur in the study cohort in each of the 185 countries and the number of lung cancer deaths that would be avoided by applying the tobacco free-generation strategy. Thus, the PIF was calculated as:

$$PIF = \frac{\text{Lung cancer deaths prevented}}{\text{Lung cancer deaths expected}} * 100$$

## **Appendix 6. Sensitivity analyses**

In this study, two sensitivity analyses were chosen to assess the robustness of the estimates instead of presenting the estimates with uncertainty intervals (UI) or confidence intervals (CI) due to several reasons. The ratio of UI or CI would not provide a satisfactory estimate as all data sources used provide parameters using different methods to obtain UI or CI of their estimates. For example, the GLOBOCAN database from which we based our mortality rates at baseline has uncertainty estimates, calculated based on data quality indicator of each national data point, rather than based on statistical modeling. On the other hand, the statistical modelling of the Nordpred package used to perform the prediction provides a CI based on the variance of the data. In addition, never-smoking rates also have CIs, but these are based on a very small proportion of the population.

The two sensitivity analyses performed are presented below:

### Sensitivity analysis 1

To provide a more conservative estimate of prevented lung cancer deaths, we ran a further scenario in which the reduction in lung cancer mortality was less effective than the main analysis where a complete reduction to the rates of never smokers was achieved. For this, lung cancer mortality rates in never smokers were increased by 25%.<sup>5</sup> The results by sex, region and income group are presented below.

**Supplementary Table 6.1. Sensitivity analysis with a lower success rate in the implementation of tobacco-free generation. Number of expected and prevented deaths, population impact fraction (PIF) and age-standardised rates (ASR) of expected and prevented deaths in men, women by world region and income group.**

| World region                | MEN             |                  |      |                     |                      | WOMEN           |                  |      |                     |                      | TOTAL           |                  |      |                     |                      |
|-----------------------------|-----------------|------------------|------|---------------------|----------------------|-----------------|------------------|------|---------------------|----------------------|-----------------|------------------|------|---------------------|----------------------|
|                             | Expected deaths | Prevented deaths | PIF  | ASR expected deaths | ASR prevented deaths | Expected deaths | Prevented deaths | PIF  | ASR expected deaths | ASR prevented deaths | Expected deaths | Prevented deaths | PIF  | ASR expected deaths | ASR prevented deaths |
| <b>Africa</b>               |                 |                  |      |                     |                      |                 |                  |      |                     |                      |                 |                  |      |                     |                      |
| Eastern Africa              | 32600           | 1200             | 3.7  | 3.5                 | 0.1                  | 32400           | 250              | 0.8  | 2.6                 | 0.1                  | 65000           | 1500             | 2.2  | 3.0                 | 0.1                  |
| Middle Africa               | 8600            | 120              | 1.4  | 2.8                 | 0.1                  | 6400            | 50               | 0.8  | 1.6                 | 0.0                  | 15000           | 170              | 1.1  | 2.1                 | 0.0                  |
| Northern Africa             | 90400           | 36300            | 40.1 | 17.0                | 6.9                  | 26500           | 1900             | 7.0  | 4.1                 | 0.1                  | 116900          | 38100            | 32.6 | 10.4                | 3.5                  |
| Southern Africa             | 14300           | 4700             | 33.1 | 17.7                | 6.5                  | 10900           | 3200             | 29.3 | 8.1                 | 1.8                  | 25100           | 7900             | 31.5 | 12.3                | 4.0                  |
| Western Africa              | 17200           | 890              | 5.2  | 2.7                 | 0.2                  | 10000           | 290              | 2.9  | 1.5                 | 0.1                  | 27200           | 1200             | 4.3  | 2.1                 | 0.1                  |
| <b>America</b>              |                 |                  |      |                     |                      |                 |                  |      |                     |                      |                 |                  |      |                     |                      |
| Latin America and Caribbean | 115100          | 7900             | 6.9  | 8.3                 | 0.7                  | 120900          | 38300            | 31.7 | 7.4                 | 2.1                  | 236000          | 46300            | 19.6 | 7.8                 | 1.5                  |
| North America               | 91200           | 34300            | 37.6 | 10.3                | 5.2                  | 94900           | 51000            | 53.7 | 9.1                 | 4.9                  | 186100          | 85300            | 45.8 | 9.7                 | 5.0                  |
| <b>Asia</b>                 |                 |                  |      |                     |                      |                 |                  |      |                     |                      |                 |                  |      |                     |                      |
| Eastern Asia                | 702800          | 352200           | 50.1 | 28.2                | 16.3                 | 369600          | 15800            | 4.3  | 13.3                | 0.2                  | 1072400         | 367900           | 34.3 | 21.1                | 8.6                  |
| South Central Asia          | 251700          | 8300             | 3.3  | 7.1                 | 0.4                  | 122300          | 7300             | 6.0  | 3.5                 | 0.2                  | 374000          | 15600            | 4.2  | 5.2                 | 0.3                  |
| South East Asia             | 161400          | 33900            | 21.0 | 16.2                | 5.3                  | 78800           | 6600             | 8.4  | 6.6                 | 0.9                  | 240200          | 40500            | 16.9 | 11.3                | 3.1                  |
| Western Asia                | 134300          | 78200            | 58.2 | 21.4                | 12.7                 | 42700           | 14300            | 33.5 | 7.3                 | 2.7                  | 177000          | 92500            | 52.2 | 14.3                | 7.7                  |
| <b>Europe</b>               |                 |                  |      |                     |                      |                 |                  |      |                     |                      |                 |                  |      |                     |                      |
| Central and Eastern Europe  | 65800           | 45300            | 68.9 | 22.6                | 17.4                 | 34000           | 17400            | 51.1 | 7.9                 | 4.0                  | 99800           | 62700            | 62.8 | 14.9                | 10.4                 |
| Northern Europe             | 30700           | 15500            | 50.5 | 13.1                | 8.0                  | 35600           | 24100            | 67.8 | 11.8                | 7.7                  | 66200           | 39600            | 59.8 | 12.5                | 7.9                  |
| Southern Europe             | 51200           | 33500            | 65.4 | 18.7                | 13.5                 | 40700           | 26600            | 65.3 | 13.7                | 9.5                  | 91900           | 60000            | 65.4 | 16.2                | 11.5                 |

|                                        |                |               |             |             |            |                |               |             |            |            |                |               |             |            |            |
|----------------------------------------|----------------|---------------|-------------|-------------|------------|----------------|---------------|-------------|------------|------------|----------------|---------------|-------------|------------|------------|
| Western Europe                         | 64200          | 39200         | 61.1        | 19.6        | 14.3       | 72300          | 52200         | 72.2        | 17.2       | 12.9       | 136400         | 91400         | 67.0        | 18.4       | 13.7       |
| <b>Oceania</b>                         |                |               |             |             |            |                |               |             |            |            |                |               |             |            |            |
| Australia and New Zealand              | 9900           | 4500          | 45.5        | 13.0        | 7.8        | 9500           | 5200          | 54.8        | 10.5       | 6.3        | 19400          | 9700          | 50.0        | 11.7       | 7.0        |
| Melanesia.<br>Micronesia.<br>Polynesia | 1700           | 810           | 48.6        | 10.1        | 5.4        | 1200           | 350           | 29.5        | 5.7        | 1.8        | 2800           | 1200          | 40.6        | 7.9        | 3.6        |
| <b>Income group</b>                    |                |               |             |             |            |                |               |             |            |            |                |               |             |            |            |
| High income                            | 356000.0       | 167800.0      | 47.1        | 13.4        | 7.3        | 321600.0       | 186900.0      | 58.1        | 10.5       | 6.2        | 677600.0       | 354700.0      | 52.3        | 11.9       | 6.7        |
| Upper middle income                    | 959500.0       | 453300.0      | 47.2        | 22.5        | 12.3       | 522600.0       | 65900.0       | 12.6        | 10.5       | 1.2        | 1482200.0      | 519200.0      | 35.0        | 16.6       | 6.8        |
| Lower middle income                    | 457600.0       | 66600.0       | 14.6        | 8.7         | 1.8        | 205200.0       | 9000.0        | 4.4         | 3.8        | 0.2        | 662700.0       | 75600.0       | 11.4        | 6.2        | 1.0        |
| Low income                             | 69800.0        | 9000.0        | 13.0        | 4.8         | 0.8        | 59100.0        | 2900.0        | 4.9         | 3.0        | 0.1        | 128900.0       | 11900.0       | 9.3         | 3.8        | 0.4        |
| <b>World</b>                           | <b>1842900</b> | <b>696800</b> | <b>37.8</b> | <b>13.2</b> | <b>5.7</b> | <b>1108500</b> | <b>264700</b> | <b>23.9</b> | <b>6.7</b> | <b>1.4</b> | <b>2951400</b> | <b>961500</b> | <b>32.6</b> | <b>9.9</b> | <b>3.6</b> |

### Sensitivity analysis 2

We assessed whether the results obtained would change if we assumed lung cancer mortality rates remained stable after 2022. For this purpose, instead of using lung cancer mortality rates for the birth cohort, we used lung cancer mortality rates for the 2022 period (GLOBOCAN 2022) to calculate both prevented lung cancer deaths and PIF.

For men, the data for the parameters analysed increase in all regions except Eastern Africa, Middle Africa, Northern Africa and Western Africa. These increases are highest in the European regions and North America.

**Supplementary Table 6.2. Sensitivity analysis assuming stable lung cancer mortality rates in men by world region**

| World region                     | Expected deaths | Prevented deaths | PIF  | ASR expected deaths | ASR prevented deaths |
|----------------------------------|-----------------|------------------|------|---------------------|----------------------|
| Eastern Africa                   | 27200           | 660              | 2.4  | 18.7                | 6.3                  |
| Middle Africa                    | 7700            | 100              | 1.4  | 2.7                 | 0.1                  |
| Northern Africa                  | 73700           | 29200            | 39.6 | 16.3                | 8.0                  |
| Southern Africa                  | 17800           | 10100            | 56.8 | 22.9                | 13.8                 |
| Western Africa                   | 14570           | 505              | 3.5  | 2.4                 | 0.1                  |
| Latin America and Caribbean      | 167100          | 49800            | 29.8 | 12.4                | 4.3                  |
| North America                    | 180500          | 134200           | 74.3 | 19.6                | 15.4                 |
| Eastern Asia                     | 1044800         | 763600           | 73.1 | 38.3                | 28.7                 |
| South Central Asia               | 290300          | 37000            | 12.7 | 9.0                 | 1.6                  |
| South East Asia                  | 251800          | 129900           | 51.6 | 23.6                | 13.9                 |
| Western Asia                     | 162700          | 112300           | 69.0 | 29.8                | 21.7                 |
| Central and Eastern Europe       | 110000          | 92100            | 83.7 | 39.4                | 35.0                 |
| Northern Europe                  | 53300           | 41100            | 77.1 | 21.3                | 17.1                 |
| Southern Europe                  | 79100           | 64900            | 82.0 | 31.9                | 27.7                 |
| Western Europe                   | 95500           | 75500            | 79.1 | 29.5                | 25.3                 |
| Australia and New Zealand        | 16800           | 12400            | 74.1 | 19.0                | 14.6                 |
| Melanesia, Micronesia, Polynesia | 2500            | 1700             | 68.2 | 14.7                | 10.5                 |

ASR: age-standardised rates; PIF: population impact fraction

For women, the estimated parameters including expected and prevented deaths as well as the PIF increased in five regions: Southern Africa, North America, Eastern Asia, Australia and New Zealand and Melanesia, Micronesia, Polynesia.

**Supplementary Table 6.3. Sensitivity analysis assuming stable lung cancer mortality rates in women by world region**

| <b>World region</b>              | <b>Expected deaths</b> | <b>Prevented deaths</b> | <b>PIF</b> | <b>ASR expected deaths</b> | <b>ASR prevented deaths</b> |
|----------------------------------|------------------------|-------------------------|------------|----------------------------|-----------------------------|
| Eastern Africa                   | 23100                  | 140                     | 0.6        | 2.4                        | 0.0                         |
| Middle Africa                    | 4800                   | 40                      | 0.8        | 1.4                        | 0.0                         |
| Northern Africa                  | 15600                  | 60                      | 0.4        | 3.2                        | 0.0                         |
| Southern Africa                  | 11600                  | 5400                    | 46.5       | 9.5                        | 4.3                         |
| Western Africa                   | 8200                   | 120                     | 1.5        | 1.4                        | 0.0                         |
| Latin America and Caribbean      | 100400                 | 26400                   | 26.3       | 7.1                        | 2.3                         |
| North America                    | 143700                 | 108500                  | 75.5       | 15.2                       | 11.8                        |
| Eastern Asia                     | 417400                 | 88200                   | 21.1       | 14.1                       | 1.0                         |
| South Central Asia               | 103700                 | 5500                    | 5.3        | 3.1                        | 0.1                         |
| South East Asia                  | 100500                 | 27700                   | 27.5       | 8.3                        | 2.8                         |
| Western Asia                     | 37400                  | 11000                   | 29.3       | 6.2                        | 1.9                         |
| Central and Eastern Europe       | 31400                  | 16300                   | 51.9       | 9.0                        | 5.7                         |
| Northern Europe                  | 42500                  | 33300                   | 78.4       | 16.6                       | 13.2                        |
| Southern Europe                  | 27300                  | 16100                   | 58.9       | 11.7                       | 8.3                         |
| Western Europe                   | 48900                  | 32800                   | 67.1       | 15.9                       | 12.5                        |
| Australia and New Zealand        | 11700                  | 8300                    | 70.6       | 13.7                       | 10.3                        |
| Melanesia, Micronesia, Polynesia | 1500                   | 810                     | 54.0       | 7.4                        | 4.2                         |

ASR: age-standardised rates; PIF: population impact fraction



We also assessed whether the results obtained for Brazil and South Africa differed if we assumed lung cancer mortality rates remained stable after 2022.

The results showed important differences between the two scenarios, with diverging patterns by sex. When a stabilization in lung cancer mortality rates is assumed, the estimates for all parameters studied increased markedly in men in both Brazil and South Africa and women in South Africa, while in women in Brazil they decreased.

**Supplementary Table 6.4. Sensitivity analysis assuming stable lung cancer mortality rates in men and women in Brazil and South Africa.**

| <b>Results</b>              | <b>Country</b> | <b>Sex</b> | <b>Expected deaths</b> | <b>Prevented deaths</b> | <b>PIF</b> | <b>ASR expected deaths</b> | <b>ASR prevented deaths</b> |
|-----------------------------|----------------|------------|------------------------|-------------------------|------------|----------------------------|-----------------------------|
| <b>Main results</b>         | Brazil         | Men        | 47300                  | 7700                    | 16.3       | 11.0                       | 1.8                         |
|                             | Brazil         | Women      | 53800                  | 27500                   | 51.1       | 10.8                       | 5.2                         |
|                             | South Africa   | Men        | 13500                  | 6400                    | 47.6       | 19.4                       | 9.8                         |
|                             | South Africa   | Women      | 10300                  | 4500                    | 43.8       | 8.8                        | 3.3                         |
| <b>Sensitivity analysis</b> | Brazil         | Men        | 64200                  | 23400                   | 36.5       | 18.7                       | 6.3                         |
|                             | Brazil         | Women      | 41200                  | 14900                   | 36.1       | 11.6                       | 4.4                         |
|                             | South Africa   | Men        | 17100                  | 10100                   | 58.8       | 25.5                       | 15.9                        |
|                             | South Africa   | Women      | 11200                  | 5400                    | 48.0       | 12.6                       | 4.9                         |

ASR: age-standardised rates; PIF: population impact fraction

**Appendix 7. Percentage and age-standardised rates (ASRs per 100,000) of lung cancer deaths expected and prevented if tobacco smoking was eliminated in the 2006-2010 birth cohort by sex and world region.**

**Supplementary Figure 7.1. Percentage and age-standardised rates (ASRs per 100,000) of lung cancer deaths expected and prevented if tobacco smoking was eliminated in the 2006-2010 birth cohort by sex and world region**

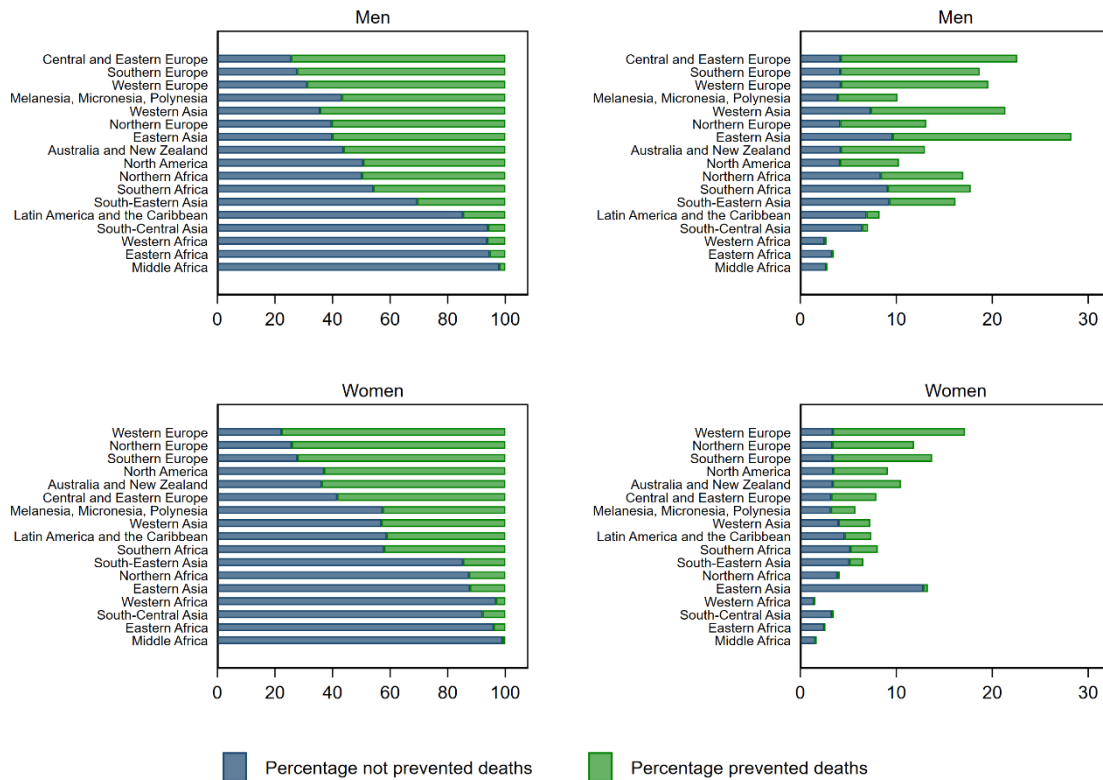

**Appendix 8. Number of expected and prevented lung cancer deaths, population impact fraction and age-standardised rate of expected and prevented lung cancer deaths in men, women, and total by country.**

Supplementary Table 8.1. Number of expected and prevented lung cancer deaths, population impact fraction (PIF) and age-standardised rate (ASR) of expected and prevented lung cancer deaths in men, women, and total by country.

| Country               | Income              | MEN             |                  |      |                     |                      | WOMEN           |                  |      |                     |                      | TOTAL           |                  |      |                     |                      |
|-----------------------|---------------------|-----------------|------------------|------|---------------------|----------------------|-----------------|------------------|------|---------------------|----------------------|-----------------|------------------|------|---------------------|----------------------|
|                       |                     | Expected deaths | Prevented deaths | PIF  | ASR expected deaths | ASR prevented deaths | Expected deaths | Prevented deaths | PIF  | ASR expected deaths | ASR prevented deaths | Expected deaths | Prevented deaths | PIF  | ASR expected deaths | ASR prevented deaths |
| <b>Africa</b>         |                     |                 |                  |      |                     |                      |                 |                  |      |                     |                      |                 |                  |      |                     |                      |
| <i>Eastern Africa</i> |                     |                 |                  |      |                     |                      |                 |                  |      |                     |                      |                 |                  |      |                     |                      |
| Burundi               | Low income          | 1200            | 50               | 4.3  | 4.6                 | 0.2                  | 760             | 0                | 0.4  | 2.7                 | 0.0                  | 1900            | 50               | 2.7  | 3.5                 | 0.1                  |
| Comoros               | Low income          | 30              | 0                | 0.0  | 2.4                 | 0.0                  | 10              | 0                | 0.0  | 0.8                 | 0.0                  | 40              | 0                | 0.0  | 1.5                 | 0.0                  |
| Djibouti              | Lower middle income | 50              | 0                | 4.0  | 3.2                 | 0.2                  | 40              | 0                | 0.0  | 2.0                 | 0.0                  | 90              | 0                | 2.2  | 2.6                 | 0.1                  |
| Eritrea               | Low income          | 250             | 0                | 0.1  | 3.1                 | 0.0                  | 330             | 0                | 0.0  | 2.9                 | 0.0                  | 580             | 0                | 0.0  | 3.0                 | 0.0                  |
| Ethiopia              | Low income          | 10100           | 150              | 1.5  | 3.8                 | 0.1                  | 13800           | 750              | 5.4  | 3.8                 | 0.2                  | 24000           | 900              | 3.7  | 3.8                 | 0.2                  |
| Kenya                 | Lower middle income | 3000            | 0                | 0.1  | 3.1                 | 0.0                  | 3100            | 0                | 0.0  | 2.8                 | 0.0                  | 6100            | 0                | 0.0  | 2.9                 | 0.0                  |
| Madagascar            | Low income          | 2100            | 10               | 0.7  | 2.9                 | 0.1                  | 800             | 10               | 1.6  | 1.3                 | 0.1                  | 2900            | 30               | 0.9  | 2.1                 | 0.1                  |
| Malawi                | Low income          | 1200            | 0                | 0.0  | 2.3                 | 0.0                  | 1200            | 0                | 0.2  | 1.3                 | 0.0                  | 2400            | 0                | 0.1  | 1.8                 | 0.0                  |
| Mauritius             | Upper middle income | 190             | 30               | 14.2 | 10.9                | 2.5                  | 90              | 0                | 1.0  | 4.2                 | 0.1                  | 280             | 30               | 9.9  | 7.4                 | 1.3                  |
| Mozambique            | Low income          | 1300            | 0                | 0.3  | 2.5                 | 0.0                  | 190             | 20               | 10.9 | 0.5                 | 0.1                  | 1500            | 30               | 1.7  | 1.3                 | 0.1                  |
| France, La Reunion    | High income         | 410             | 200              | 49.2 | 22.0                | 12.4                 | 150             | 20               | 13.5 | 6.1                 | 0.6                  | 560             | 220              | 39.6 | 13.8                | 6.4                  |
| Rwanda                | Low income          | 1400            | 20               | 1.6  | 4.2                 | 0.2                  | 520             | 0                | 0.8  | 1.4                 | 0.0                  | 1900            | 30               | 1.4  | 2.7                 | 0.1                  |
| Somalia               | Low income          | 860             | 10               | 1.2  | 3.9                 | 0.1                  | 910             | 0                | 0.3  | 3.1                 | 0.0                  | 1800            | 10               | 0.7  | 3.5                 | 0.0                  |
| South Sudan           | Low income          | 340             | 10               | 2.1  | 2.2                 | 0.1                  | 360             | 0                | 0.3  | 1.8                 | 0.0                  | 700             | 10               | 1.1  | 2.0                 | 0.0                  |
| Tanzania              | Low income          | 2800            | 70               | 2.3  | 2.5                 | 0.1                  | 3100            | 60               | 2.0  | 2.0                 | 0.1                  | 5900            | 130              | 2.1  | 2.2                 | 0.1                  |
| Uganda                | Low income          | 2700            | 50               | 2.0  | 3.2                 | 0.1                  | 4500            | 150              | 3.3  | 2.9                 | 0.1                  | 7200            | 200              | 2.8  | 3.1                 | 0.1                  |
| Zambia                | Lower middle income | 2400            | 490              | 20.9 | 5.6                 | 1.0                  | 820             | 10               | 0.8  | 2.1                 | 0.0                  | 3200            | 500              | 15.7 | 3.3                 | 0.4                  |
| Zimbabwe              | Low income          | 2400            | 670              | 28.1 | 9.9                 | 2.5                  | 1600            | 280              | 17.1 | 4.3                 | 0.5                  | 4000            | 1000             | 23.7 | 6.6                 | 1.3                  |
| <i>Middle Africa</i>  |                     |                 |                  |      |                     |                      |                 |                  |      |                     |                      |                 |                  |      |                     |                      |

|                               |                     |       |       |      |      |      |       |      |      |     |     |       |       |      |      |      |
|-------------------------------|---------------------|-------|-------|------|------|------|-------|------|------|-----|-----|-------|-------|------|------|------|
| Angola                        | Lower middle income | 430   | 40    | 8.7  | 1.0  | 0.1  | 480   | 0    | 0.0  | 0.8 | 0.0 | 900   | 40    | 4.1  | 0.9  | 0.1  |
| Cameroon                      | Lower middle income | 2000  | 50    | 2.6  | 4.6  | 0.1  | 1200  | 0    | 0.3  | 2.2 | 0.0 | 3100  | 50    | 1.7  | 3.3  | 0.1  |
| Central African Republic      | Low income          | 150   | 0     | 0.0  | 2.4  | 0.0  | 160   | 0    | 0.0  | 1.8 | 0.0 | 310   | 0     | 0.0  | 2.1  | 0.0  |
| Chad                          | Low income          | 780   | 20    | 3.0  | 3.2  | 0.2  | 340   | 0    | 0.0  | 1.0 | 0.0 | 1100  | 20    | 2.1  | 2.1  | 0.1  |
| Congo, Republic of            | Lower middle income | 170   | 0     | 0.0  | 1.8  | 0.0  | 70    | 0    | 0.0  | 0.7 | 0.0 | 240   | 0     | 0.0  | 1.2  | 0.0  |
| Congo, Democratic Republic of | Low income          | 4900  | 50    | 1.0  | 2.9  | 0.1  | 3900  | 10   | 0.3  | 1.8 | 0.0 | 8800  | 60    | 0.7  | 2.3  | 0.0  |
| Equatorial Guinea             | Upper middle income | 60    | 0     | 0.0  | 2.5  | 0.0  | 60    | 10   | 12.8 | 2.8 | 0.6 | 120   | 10    | 6.6  | 2.6  | 0.2  |
| Gabon                         | Upper middle income | 90    | 0     | 1.3  | 2.9  | 0.1  | 140   | 10   | 3.9  | 3.2 | 0.3 | 230   | 10    | 2.9  | 3.1  | 0.2  |
| Sao Tome and Principe         | Lower middle income | 40    | 20    | 50.1 | 14.6 | 8.1  | 50    | 30   | 61.9 | 9.7 | 5.5 | 90    | 50    | 56.3 | 12.2 | 6.9  |
| <b>Northern Africa</b>        |                     |       |       |      |      |      |       |      |      |     |     |       |       |      |      |      |
| Algeria                       | Upper middle income | 17800 | 7100  | 40.1 | 18.1 | 8.5  | 3800  | 10   | 0.3  | 3.5 | 0.1 | 21600 | 7200  | 33.1 | 10.8 | 4.3  |
| Egypt                         | Lower middle income | 27700 | 8000  | 29.2 | 13.2 | 3.6  | 14000 | 3200 | 22.5 | 5.1 | 0.6 | 41700 | 11200 | 26.9 | 9.0  | 2.1  |
| Libya                         | Upper middle income | 6000  | 4700  | 77.6 | 33.8 | 24.1 | 550   | 0    | 0.0  | 3.6 | 0.0 | 6600  | 4700  | 71.1 | 17.7 | 11.2 |
| Morocco                       | Lower middle income | 29400 | 20700 | 70.3 | 35.4 | 25.7 | 3600  | 20   | 0.5  | 4.4 | 0.1 | 33000 | 20700 | 62.6 | 20.1 | 13.0 |
| Sudan                         | Lower middle income | 2600  | 10    | 0.2  | 3.1  | 0.0  | 3400  | 140  | 4.1  | 2.6 | 0.1 | 6000  | 150   | 2.4  | 2.8  | 0.1  |
| Tunisia                       | Lower middle income | 6800  | 4400  | 64.7 | 33.7 | 24.0 | 1000  | 0    | 0.3  | 4.7 | 0.1 | 7900  | 4400  | 56.2 | 19.4 | 12.2 |
| <b>Southern Africa</b>        |                     |       |       |      |      |      |       |      |      |     |     |       |       |      |      |      |
| Botswana                      | Upper middle income | 280   | 20    | 7.4  | 6.4  | 0.4  | 80    | 0    | 0.0  | 1.7 | 0.0 | 360   | 20    | 5.7  | 3.8  | 0.2  |
| Eswatini                      | Lower middle income | 150   | 70    | 46.3 | 11.2 | 5.7  | 70    | 10   | 14.3 | 3.2 | 0.7 | 220   | 80    | 35.8 | 5.4  | 1.8  |
| Lesotho                       | Lower middle income | 110   | 10    | 6.0  | 5.2  | 0.4  | 150   | 30   | 20.8 | 4.2 | 0.6 | 260   | 40    | 14.7 | 4.7  | 0.5  |
| Namibia                       | Upper middle income | 280   | 30    | 10.2 | 8.2  | 1.0  | 210   | 0    | 0.5  | 4.2 | 0.0 | 500   | 30    | 6.0  | 5.9  | 0.5  |

|                                    |                     |       |      |      |      |      |       |       |      |      |     |        |       |      |      |     |
|------------------------------------|---------------------|-------|------|------|------|------|-------|-------|------|------|-----|--------|-------|------|------|-----|
| South Africa                       | Upper middle income | 13500 | 6400 | 47.6 | 19.4 | 9.8  | 10300 | 4500  | 43.8 | 8.8  | 3.3 | 23800  | 10900 | 45.9 | 13.4 | 6.2 |
| <b>Western Africa</b>              |                     |       |      |      |      |      |       |       |      |      |     |        |       |      |      |     |
| Benin                              | Low income          | 290   | 270  | 29.4 | 3.3  | 1.0  | 270   | 0     | 1.0  | 1.1  | 0.0 | 1200   | 270   | 23.0 | 2.0  | 0.4 |
| Burkina Faso                       | Low income          | 440   | 0    | 1.0  | 1.1  | 0.0  | 1200  | 10    | 1.2  | 2.4  | 0.1 | 1600   | 20    | 1.1  | 1.8  | 0.0 |
| Cape Verde                         | Lower middle income | 390   | 310  | 78.1 | 21.7 | 14.2 | 200   | 150   | 71.7 | 9.6  | 5.8 | 600    | 450   | 76.0 | 14.7 | 9.2 |
| Cote d'Ivoire                      | Lower middle income | 1300  | 20   | 1.4  | 3.5  | 0.1  | 540   | 0     | 0.2  | 1.3  | 0.0 | 1800   | 20    | 1.0  | 2.3  | 0.0 |
| Gambia, The Republic of the        | Low income          | 400   | 90   | 23.2 | 10.1 | 2.1  | 40    | 0     | 0.0  | 0.9  | 0.0 | 450    | 90    | 20.9 | 5.0  | 0.9 |
| Ghana                              | Lower middle income | 1400  | 40   | 2.5  | 3.1  | 0.1  | 1400  | 110   | 7.9  | 2.4  | 0.5 | 2800   | 150   | 5.2  | 2.8  | 0.3 |
| Guinea                             | Low income          | 840   | 120  | 13.8 | 4.7  | 0.9  | 270   | 20    | 6.0  | 1.7  | 0.1 | 1100   | 130   | 11.9 | 3.1  | 0.5 |
| Guinea-Bissau                      | Low income          | 60    | 0    | 7.2  | 2.7  | 0.2  | 30    | 0     | 0.0  | 1.1  | 0.0 | 90     | 0     | 4.9  | 1.9  | 0.1 |
| Liberia                            | Low income          | 300   | 10   | 3.6  | 3.6  | 0.2  | 120   | 0     | 0.0  | 1.5  | 0.0 | 420    | 10    | 2.5  | 2.5  | 0.1 |
| Mali                               | Low income          | 1300  | 30   | 2.4  | 4.3  | 0.2  | 660   | 30    | 4.2  | 2.1  | 0.1 | 2000   | 60    | 3.0  | 3.2  | 0.1 |
| Mauritania                         | Lower middle income | 210   | 0    | 1.4  | 2.8  | 0.1  | 100   | 0     | 0.0  | 1.2  | 0.0 | 310    | 0     | 0.9  | 1.9  | 0.0 |
| Niger                              | Low income          | 860   | 20   | 1.9  | 1.9  | 0.1  | 90    | 0     | 0.0  | 0.1  | 0.0 | 950    | 20    | 1.8  | 1.0  | 0.0 |
| Nigeria                            | Lower middle income | 6900  | 0    | 0.0  | 2.3  | 0.0  | 4600  | 0     | 0.0  | 1.5  | 0.0 | 11400  | 0     | 0.0  | 1.9  | 0.0 |
| Senegal                            | Low income          | 1100  | 40   | 3.4  | 3.7  | 0.2  | 380   | 0     | 0.8  | 1.4  | 0.0 | 1500   | 40    | 2.8  | 2.5  | 0.1 |
| Sierra Leone                       | Low income          | 180   | 20   | 8.0  | 1.9  | 0.2  | 0     | 0     | 0.0  | 0.0  | 0.0 | 190    | 20    | 8.0  | 0.9  | 0.1 |
| Togo                               | Low income          | 570   | 110  | 19.4 | 3.9  | 0.9  | 150   | 0     | 0.0  | 0.8  | 0.0 | 720    | 110   | 15.5 | 2.2  | 0.4 |
| <b>America</b>                     |                     |       |      |      |      |      |       |       |      |      |     |        |       |      |      |     |
| <b>Latin America and Caribbean</b> |                     |       |      |      |      |      |       |       |      |      |     |        |       |      |      |     |
| Argentina                          | High income         | 11800 | 2400 | 20.6 | 13.0 | 3.5  | 1700  | 4700  | 44.0 | 9.6  | 4.1 | 22500  | 7100  | 31.7 | 11.3 | 3.8 |
| Bahamas                            | High income         | 40    | 0    | 4.7  | 5.8  | 0.5  | 30    | 0     | 11.8 | 2.8  | 0.2 | 70     | 10    | 7.6  | 4.3  | 0.4 |
| Barbados                           | High income         | 30    | 0    | 7.6  | 7.1  | 1.4  | 30    | 10    | 16.0 | 5.2  | 0.6 | 60     | 10    | 11.9 | 6.2  | 1.0 |
| Belize                             | Upper middle income | 60    | 20   | 24.0 | 9.2  | 3.0  | 20    | 0     | 15.7 | 2.8  | 0.9 | 80     | 20    | 22.1 | 5.9  | 1.9 |
| Bolivia                            | Lower middle income | 2100  | 150  | 7.1  | 6.3  | 0.2  | 1700  | 180   | 10.4 | 5.3  | 0.3 | 3800   | 320   | 8.6  | 5.8  | 0.2 |
| Brazil                             | Upper middle income | 47300 | 7700 | 16.3 | 11.0 | 1.8  | 53800 | 27500 | 51.1 | 10.8 | 5.2 | 101100 | 35200 | 34.8 | 10.9 | 3.6 |

|                    |                     |       |      |      |      |      |      |      |      |      |      |       |      |      |      |      |
|--------------------|---------------------|-------|------|------|------|------|------|------|------|------|------|-------|------|------|------|------|
| Chile              | High income         | 4400  | 430  | 9.8  | 9.6  | 0.7  | 3900 | 1400 | 37.1 | 7.3  | 2.1  | 8300  | 1900 | 22.6 | 8.4  | 1.4  |
| Colombia           | Upper middle income | 9500  | 180  | 1.9  | 8.0  | 0.2  | 7400 | 1000 | 14.0 | 5.4  | 0.4  | 16800 | 1200 | 7.2  | 6.7  | 0.3  |
| Costa Rica         | Upper middle income | 570   | 0    | 0.7  | 4.9  | 0.2  | 480  | 0    | 0.2  | 3.6  | 0.0  | 1100  | 10   | 0.5  | 4.3  | 0.1  |
| Cuba               | Upper middle income | 4000  | 2200 | 55.6 | 20.5 | 11.1 | 3200 | 2200 | 68.8 | 15.6 | 10.2 | 7200  | 4400 | 61.5 | 18.0 | 10.6 |
| Dominican Republic | Upper middle income | 1700  | 30   | 1.6  | 8.4  | 0.5  | 2000 | 650  | 32.5 | 8.1  | 2.4  | 3700  | 680  | 18.1 | 8.3  | 1.5  |
| Ecuador            | Upper middle income | 2000  | 10   | 0.5  | 3.7  | 0.1  | 2400 | 150  | 6.2  | 4.2  | 0.1  | 4500  | 160  | 3.6  | 3.9  | 0.1  |
| El Salvador        | Lower middle income | 320   | 10   | 1.6  | 3.4  | 0.2  | 330  | 0    | 0.4  | 2.1  | 0.0  | 640   | 10   | 1.0  | 2.7  | 0.1  |
| France, Guadalupe  | High income         | 70    | 10   | 15.6 | 11.7 | 3.4  | 40   | 0    | 6.3  | 5.8  | 1.2  | 110   | 10   | 11.9 | 8.7  | 2.2  |
| France, Martinique | High income         | 50    | 10   | 12.0 | 8.4  | 1.5  | 30   | 0    | 1.6  | 4.2  | 0.2  | 80    | 10   | 8.5  | 6.1  | 0.8  |
| French Guiana      | High income         | 160   | 60   | 38.4 | 14.4 | 5.3  | 50   | 10   | 26.8 | 6.0  | 1.7  | 210   | 80   | 35.5 | 10.0 | 3.4  |
| Guatemala          | Upper middle income | 1700  | 10   | 0.8  | 3.4  | 0.1  | 1700 | 0    | 0.2  | 3.1  | 0.0  | 3400  | 20   | 0.5  | 3.2  | 0.1  |
| Guyana             | Upper middle income | 30    | 0    | 6.2  | 3.8  | 0.5  | 20   | 0    | 0.0  | 2.0  | 0.0  | 50    | 0    | 4.2  | 2.9  | 0.3  |
| Haiti              | Low income          | 600   | 0    | 0.3  | 3.6  | 0.0  | 1300 | 350  | 26.8 | 6.1  | 1.6  | 1900  | 350  | 18.5 | 4.9  | 0.9  |
| Honduras           | Lower middle income | 930   | 0    | 0.5  | 3.5  | 0.1  | 1000 | 10   | 1.2  | 4.0  | 0.2  | 2000  | 20   | 0.8  | 3.8  | 0.1  |
| Jamaica            | Upper middle income | 410   | 50   | 13.1 | 11.6 | 2.6  | 440  | 190  | 42.1 | 8.5  | 2.9  | 850   | 240  | 28.3 | 10.0 | 2.8  |
| Mexico             | Upper middle income | 11100 | 50   | 0.5  | 4.3  | 0.1  | 8300 | 20   | 0.2  | 3.0  | 0.0  | 19300 | 70   | 0.4  | 3.6  | 0.0  |
| Nicaragua          | Lower middle income | 800   | 10   | 0.7  | 4.7  | 0.1  | 590  | 20   | 2.7  | 3.9  | 0.3  | 1400  | 20   | 1.5  | 4.3  | 0.2  |
| Panama             | High income         | 400   | 0    | 0.3  | 3.6  | 0.0  | 400  | 0    | 1.1  | 3.4  | 0.2  | 780   | 10   | 0.7  | 3.5  | 0.1  |
| Paraguay           | Upper middle income | 2100  | 760  | 35.4 | 14.8 | 5.5  | 700  | 0    | 0.3  | 3.9  | 0.0  | 2800  | 760  | 26.7 | 9.2  | 2.7  |
| Peru               | Upper middle income | 3100  | 20   | 0.8  | 4.3  | 0.1  | 4400 | 210  | 4.7  | 5.1  | 0.2  | 7500  | 230  | 3.1  | 4.7  | 0.2  |
| Puerto Rico        | High income         | 410   | 0    | 0.6  | 6.6  | 0.1  | 260  | 0    | 0.0  | 3.1  | 0.0  | 670   | 0    | 0.4  | 4.8  | 0.1  |
| Saint Lucia        | Upper middle income | 50    | 30   | 68.8 | 9.4  | 4.8  | 10   | 0    | 9.5  | 1.1  | 0.1  | 60    | 40   | 61.1 | 5.1  | 2.4  |

|                               |                     |        |        |      |      |      |        |       |      |      |      |        |        |      |      |      |
|-------------------------------|---------------------|--------|--------|------|------|------|--------|-------|------|------|------|--------|--------|------|------|------|
| Suriname                      | Upper middle income | 320    | 230    | 71.7 | 34.1 | 24.5 | 180    | 120   | 65.3 | 15.8 | 10.3 | 500    | 350    | 69.5 | 24.2 | 16.9 |
| Trinidad and Tobago           | High income         | 220    | 40     | 18.8 | 12.0 | 3.0  | 90     | 0     | 0.0  | 3.7  | 0.0  | 310    | 40     | 13.4 | 7.6  | 1.4  |
| Uruguay                       | High income         | 1500   | 860    | 58.4 | 26.7 | 17.3 | 1200   | 830   | 67.4 | 19.2 | 13.5 | 2700   | 1700   | 62.5 | 22.8 | 15.4 |
| Venezuela                     | Upper middle income | 7300   | 1600   | 22.1 | 12.8 | 3.3  | 14100  | 10200 | 72.2 | 16.8 | 11.2 | 21400  | 11800  | 55.1 | 15.0 | 7.7  |
| <b>North America</b>          |                     |        |        |      |      |      |        |       |      |      |      |        |        |      |      |      |
| Canada                        | High income         | 16500  | 11100  | 67.7 | 12.0 | 7.8  | 22400  | 18300 | 81.5 | 12.1 | 8.7  | 38900  | 29400  | 75.7 | 12.1 | 8.3  |
| United States of America      | High income         | 74700  | 33800  | 45.3 | 10.0 | 5.9  | 72400  | 41400 | 57.2 | 8.7  | 5.3  | 147200 | 75300  | 51.2 | 9.4  | 5.6  |
| <b>Asia</b>                   |                     |        |        |      |      |      |        |       |      |      |      |        |        |      |      |      |
| <b>Eastern Asia</b>           |                     |        |        |      |      |      |        |       |      |      |      |        |        |      |      |      |
| China                         | Upper middle income | 628300 | 379500 | 60.4 | 29.4 | 19.7 | 329900 | 30400 | 9.2  | 14.0 | 0.4  | 958100 | 409900 | 42.8 | 22.2 | 10.6 |
| Japan                         | High income         | 45600  | 26100  | 57.3 | 15.9 | 7.1  | 23200  | 11000 | 47.5 | 5.2  | 1.1  | 68800  | 37200  | 54.0 | 10.3 | 3.9  |
| Korea, Democratic Republic of | Low income          | 10100  | 6200   | 61.8 | 31.4 | 21.8 | 9900   | 2100  | 21.4 | 24.1 | 2.6  | 20000  | 8400   | 41.8 | 27.7 | 12.1 |
| Korea, Republic of            | High income         | 18100  | 9900   | 54.7 | 13.9 | 5.1  | 6400   | 1800  | 27.9 | 3.7  | 0.4  | 24500  | 11700  | 47.7 | 8.6  | 2.6  |
| Mongolia                      | Lower middle income | 660    | 160    | 24.3 | 14.4 | 5.0  | 250    | 0     | 0.0  | 3.3  | 0.0  | 910    | 160    | 17.6 | 8.4  | 2.4  |
| <b>South-Central Asia</b>     |                     |        |        |      |      |      |        |       |      |      |      |        |        |      |      |      |
| Afghanistan                   | Low income          | 5700   | 450    | 7.9  | 8.6  | 1.3  | 2200   | 50    | 2.4  | 3.0  | 0.2  | 7900   | 500    | 6.3  | 5.6  | 0.7  |
| Bangladesh                    | Lower middle income | 35930  | 4200   | 11.7 | 10.3 | 1.4  | 8100   | 190   | 2.4  | 3.2  | 0.1  | 44000  | 4400   | 10.0 | 6.7  | 0.8  |
| Bhutan                        | Lower middle income | 120    | 0      | 0.0  | 5.5  | 0.0  | 100    | 20    | 20.6 | 6.1  | 1.0  | 220    | 20     | 9.6  | 5.8  | 0.5  |
| India                         | Lower middle income | 153600 | 3100   | 2.0  | 6.5  | 0.4  | 81500  | 1100  | 1.3  | 3.6  | 0.1  | 235100 | 4200   | 1.8  | 5.1  | 0.3  |
| Iran                          | Upper middle income | 7700   | 2100   | 26.9 | 3.9  | 0.8  | 16300  | 7300  | 45.0 | 6.2  | 1.6  | 24000  | 9400   | 39.2 | 5.1  | 1.2  |
| Kazakhstan                    | Upper middle income | 3000   | 790    | 26.3 | 12.3 | 4.4  | 580    | 10    | 1.1  | 1.9  | 0.1  | 3600   | 800    | 22.2 | 6.9  | 2.2  |
| Kyrgyzstan                    | Lower middle income | 1200   | 250    | 21.8 | 12.7 | 3.8  | 590    | 10    | 1.3  | 4.3  | 0.1  | 1700   | 260    | 14.8 | 8.3  | 1.9  |
| Maldives                      | Upper middle income | 120    | 10     | 6.4  | 10.6 | 1.4  | 70     | 20    | 26.5 | 5.0  | 0.6  | 190    | 30     | 14.0 | 8.0  | 1.1  |
| Nepal                         | Low income          | 6500   | 1200   | 18.6 | 10.3 | 1.5  | 4100   | 740   | 18.0 | 4.8  | 0.4  | 10600  | 1900   | 18.4 | 7.3  | 0.9  |

|                                  |                     |       |       |      |      |      |       |      |      |      |      |       |       |      |      |      |
|----------------------------------|---------------------|-------|-------|------|------|------|-------|------|------|------|------|-------|-------|------|------|------|
| Pakistan                         | Lower middle income | 28600 | 1900  | 6.7  | 7.4  | 0.6  | 5800  | 100  | 1.7  | 1.8  | 0.1  | 34400 | 2000  | 5.9  | 4.4  | 0.3  |
| Sri Lanka                        | Lower middle income | 3500  | 440   | 12.5 | 9.0  | 0.8  | 810   | 0    | 0.4  | 2.5  | 0.0  | 4400  | 450   | 10.3 | 5.5  | 0.4  |
| Tajikistan                       | Low income          | 840   | 30    | 4.0  | 5.5  | 0.6  | 580   | 10   | 2.5  | 3.1  | 0.3  | 1400  | 48    | 3.4  | 4.2  | 0.4  |
| Turkmenistan                     | Upper middle income | 600   | 120   | 19.8 | 9.8  | 2.6  | 260   | 20   | 6.8  | 3.4  | 0.3  | 860   | 140   | 15.8 | 6.3  | 1.5  |
| Uzbekistan                       | Lower middle income | 4200  | 340   | 8.1  | 9.3  | 1.2  | 1400  | 30   | 2.1  | 3.1  | 0.2  | 5600  | 370   | 6.6  | 6.0  | 0.7  |
| <b>South-Eastern Asia</b>        |                     |       |       |      |      |      |       |      |      |      |      |       |       |      |      |      |
| Brunei Darussalam                | High income         | 130   | 50    | 35.5 | 18.6 | 9.1  | 130   | 80   | 63.7 | 17.2 | 11.8 | 260   | 130   | 49.3 | 17.9 | 10.5 |
| Cambodia                         | Lower middle income | 4200  | 1400  | 33.9 | 17.7 | 8.2  | 2000  | 330  | 16.8 | 7.4  | 2.1  | 6200  | 1800  | 28.4 | 12.2 | 5.0  |
| Indonesia                        | Lower middle income | 52800 | 7000  | 13.2 | 11.9 | 2.7  | 25500 | 80   | 0.3  | 4.7  | 0.0  | 78300 | 7000  | 9.0  | 8.3  | 1.4  |
| Lao People's Democratic Republic | Lower middle income | 2000  | 810   | 40.1 | 20.0 | 10.5 | 790   | 90   | 11.9 | 6.6  | 1.4  | 2800  | 900   | 32.2 | 13.0 | 5.9  |
| Malaysia                         | Upper middle income | 11900 | 300   | 36.0 | 17.6 | 8.0  | 3800  | 90   | 2.3  | 5.5  | 0.2  | 15700 | 4400  | 27.8 | 11.6 | 4.1  |
| Myanmar                          | Lower middle income | 8000  | 1500  | 18.1 | 12.4 | 3.1  | 7300  | 2000 | 27.7 | 8.5  | 3.0  | 15300 | 3500  | 22.7 | 10.2 | 3.0  |
| Philippines                      | Lower middle income | 38500 | 18000 | 46.6 | 23.4 | 13.7 | 19000 | 4700 | 24.7 | 8.8  | 3.1  | 57500 | 22600 | 39.4 | 15.8 | 8.3  |
| Singapore                        | High income         | 3000  | 1600  | 55.1 | 20.3 | 10.8 | 1600  | 860  | 53.1 | 9.8  | 4.2  | 4600  | 2500  | 54.4 | 15.2 | 7.6  |
| Thailand                         | Upper middle income | 16800 | 5000  | 29.7 | 14.2 | 4.6  | 8400  | 1400 | 16.3 | 6.9  | 1.4  | 25200 | 6400  | 25.2 | 10.4 | 3.0  |
| Timor-Leste                      | Lower middle income | 290   | 50    | 15.8 | 11.0 | 1.4  | 130   | 0    | 0.2  | 4.5  | 0.0  | 420   | 50    | 11.0 | 7.5  | 0.6  |
| Vietnam                          | Lower middle income | 23700 | 9700  | 41.0 | 21.7 | 13.0 | 10100 | 2000 | 19.3 | 7.8  | 2.6  | 33900 | 11700 | 34.5 | 14.8 | 7.9  |
| <b>Western Asia</b>              |                     |       |       |      |      |      |       |      |      |      |      |       |       |      |      |      |
| Armenia                          | Upper middle income | 730   | 320   | 43.6 | 22.3 | 12.7 | 360   | 100  | 29.1 | 6.4  | 1.1  | 1100  | 420   | 38.8 | 14.2 | 6.9  |
| Azerbaijan                       | Upper middle income | 2300  | 830   | 35.8 | 18.3 | 8.6  | 530   | 10   | 1.7  | 4.4  | 0.2  | 2800  | 840   | 29.5 | 11.4 | 4.5  |
| Bahrain                          | High income         | 440   | 240   | 56.3 | 3.6  | 1.7  | 170   | 120  | 67.1 | 2.8  | 1.4  | 610   | 360   | 59.4 | 3.3  | 1.6  |
| Georgia                          | Lower middle income | 590   | 220   | 37.2 | 17.8 | 9.1  | 150   | 0    | 0.5  | 3.3  | 0.1  | 740   | 220   | 29.6 | 10.4 | 4.5  |



|                                   |                     |       |       |      |      |      |       |       |      |      |      |        |       |      |      |      |
|-----------------------------------|---------------------|-------|-------|------|------|------|-------|-------|------|------|------|--------|-------|------|------|------|
| Iraq                              | Upper middle income | 12100 | 4100  | 33.6 | 14.7 | 5.3  | 2300  | 10    | 0.4  | 2.7  | 0.0  | 14500  | 4100  | 28.2 | 8.3  | 2.5  |
| Israel                            | High income         | 3500  | 870   | 24.7 | 13.8 | 4.2  | 2700  | 1200  | 44.9 | 7.7  | 2.7  | 6200   | 2100  | 33.4 | 10.8 | 3.5  |
| Jordan                            | Upper middle income | 3000  | 850   | 28.2 | 14.9 | 5.9  | 780   | 10    | 1.5  | 3.9  | 0.1  | 3800   | 860   | 22.7 | 9.3  | 3.0  |
| Kuwait                            | High income         | 640   | 20    | 3.6  | 4.9  | 0.2  | 210   | 0     | 0.0  | 2.2  | 0.0  | 850    | 20    | 2.7  | 3.7  | 0.1  |
| Lebanon                           | Upper middle income | 2200  | 940   | 42.4 | 15.8 | 6.2  | 1300  | 590   | 47.0 | 10.2 | 4.6  | 3500   | 1500  | 44.1 | 13.1 | 5.4  |
| Oman                              | High income         | 870   | 20    | 1.9  | 4.0  | 0.2  | 170   | 0     | 0.0  | 2.2  | 0.0  | 1000   | 20    | 1.6  | 3.4  | 0.1  |
| Palestine                         | Lower middle income | 1800  | 440   | 24.4 | 15.5 | 5.9  | 780   | 20    | 3.1  | 5.0  | 0.2  | 2600   | 470   | 18.0 | 10.2 | 3.1  |
| Qatar                             | High income         | 610   | 20    | 3.6  | 3.8  | 0.1  | 190   | 30    | 13.3 | 3.9  | 0.7  | 800    | 50    | 6.0  | 3.8  | 0.3  |
| Saudi Arabia                      | High income         | 3200  | 0     | 0.0  | 3.2  | 0.0  | 970   | 10    | 1.0  | 1.8  | 0.1  | 4200   | 10    | 0.3  | 2.6  | 0.0  |
| Syrian Arab Republic              | Low income          | 5700  | 1600  | 27.5 | 16.5 | 7.4  | 4300  | 1300  | 30.0 | 6.8  | 1.3  | 10000  | 2900  | 28.6 | 11.6 | 4.4  |
| United Arab Emirates              | High income         | 960   | 60    | 6.5  | 4.5  | 0.2  | 430   | 0     | 0.0  | 3.5  | 0.0  | 1400   | 60    | 4.5  | 4.0  | 0.1  |
| Turkey                            | Upper middle income | 94700 | 75900 | 80.1 | 50.8 | 41.4 | 26500 | 14800 | 56.0 | 15.8 | 10.1 | 121200 | 90700 | 74.9 | 32.9 | 25.4 |
| Yemen                             | Low income          | 890   | 10    | 1.2  | 2.1  | 0.1  | 940   | 150   | 16.2 | 2.9  | 0.6  | 1800   | 160   | 8.9  | 2.4  | 0.3  |
| <b>Europe</b>                     |                     |       |       |      |      |      |       |       |      |      |      |        |       |      |      |      |
| <i>Central and Eastern Europe</i> |                     |       |       |      |      |      |       |       |      |      |      |        |       |      |      |      |
| Belarus                           | Upper middle income | 3100  | 2600  | 82.5 | 36.9 | 32.5 | 490   | 120   | 25.2 | 4.9  | 1.8  | 3600   | 2700  | 74.7 | 20.1 | 16.4 |
| Bulgaria                          | Upper middle income | 1600  | 1200  | 73.9 | 21.5 | 17.2 | 910   | 580   | 63.7 | 13.5 | 10.0 | 2500   | 1700  | 70.2 | 17.4 | 13.5 |
| Czechia                           | High income         | 1700  | 740   | 42.7 | 10.0 | 5.9  | 1900  | 1200  | 59.9 | 9.2  | 5.9  | 3700   | 1900  | 51.8 | 9.6  | 5.9  |
| Hungary                           | High income         | 3600  | 2900  | 80.9 | 28.4 | 24.3 | 3500  | 3000  | 84.0 | 20.7 | 17.4 | 7100   | 5800  | 82.5 | 24.6 | 20.8 |
| Moldova                           | Lower middle income | 660   | 500   | 75.2 | 22.2 | 18.1 | 260   | 80    | 31.3 | 5.6  | 2.2  | 910    | 570   | 62.9 | 13.5 | 9.8  |
| Poland                            | High income         | 10700 | 7900  | 73.8 | 20.3 | 16.2 | 12000 | 9600  | 80.1 | 16.9 | 13.5 | 22700  | 17500 | 77.1 | 18.6 | 14.9 |
| Romania                           | Upper middle income | 6200  | 4900  | 78.6 | 26.1 | 21.9 | 3100  | 2000  | 65.1 | 12.6 | 9.1  | 9400   | 6900  | 74.1 | 19.2 | 15.3 |
| Russian Federation                | Upper middle income | 30100 | 22400 | 74.2 | 23.2 | 19.0 | 9400  | 2400  | 25.7 | 5.2  | 2.0  | 39600  | 24800 | 62.7 | 13.6 | 9.9  |
| Slovakia                          | High income         | 1300  | 910   | 70.1 | 15.7 | 11.6 | 1100  | 750   | 70.3 | 11.1 | 7.8  | 2400   | 1700  | 70.2 | 13.3 | 9.7  |
| Ukraine                           | Lower middle income | 6800  | 5000  | 73.3 | 20.5 | 16.5 | 1300  | 140   | 11.1 | 3.2  | 0.6  | 8100   | 5100  | 63.3 | 11.3 | 8.1  |
| <i>Northern Europe</i>            |                     |       |       |      |      |      |       |       |      |      |      |        |       |      |      |      |

|                        |                     |       |       |      |      |      |       |       |      |      |      |       |       |      |      |      |
|------------------------|---------------------|-------|-------|------|------|------|-------|-------|------|------|------|-------|-------|------|------|------|
| Denmark                | High income         | 1800  | 1200  | 63.9 | 14.9 | 10.7 | 1800  | 1300  | 72.2 | 12.0 | 8.6  | 3700  | 2500  | 68.1 | 13.4 | 9.6  |
| Estonia                | High income         | 250   | 150   | 61.3 | 12.0 | 7.9  | 130   | 50    | 37.2 | 5.0  | 1.9  | 380   | 200   | 53.0 | 8.3  | 4.8  |
| Finland                | High income         | 1200  | 640   | 51.8 | 11.2 | 7.1  | 1300  | 860   | 64.1 | 7.5  | 4.3  | 2600  | 1500  | 58.2 | 9.3  | 5.8  |
| Iceland                | High income         | 60    | 10    | 24.2 | 7.7  | 3.6  | 110   | 70    | 69.3 | 7.2  | 3.9  | 160   | 90    | 53.2 | 7.5  | 3.8  |
| Ireland                | High income         | 1800  | 1100  | 62.6 | 14.0 | 9.9  | 2300  | 1800  | 78.0 | 13.7 | 10.3 | 4100  | 3000  | 71.2 | 13.9 | 10.2 |
| Latvia                 | High income         | 380   | 280   | 72.7 | 22.3 | 18.0 | 170   | 70    | 44.4 | 7.6  | 4.1  | 550   | 350   | 64.1 | 14.6 | 10.8 |
| Lithuania              | High income         | 390   | 260   | 67.0 | 20.7 | 16.5 | 220   | 100   | 45.6 | 8.9  | 5.4  | 610   | 360   | 59.3 | 14.5 | 10.7 |
| Norway                 | High income         | 2000  | 1200  | 61.4 | 9.9  | 6.0  | 2900  | 2400  | 80.7 | 11.1 | 7.9  | 4900  | 3600  | 72.8 | 10.5 | 7.0  |
| Sweden                 | High income         | 1900  | 670   | 34.8 | 7.6  | 3.5  | 3400  | 2400  | 72.2 | 8.5  | 5.3  | 5300  | 3100  | 58.6 | 8.1  | 4.5  |
| United Kingdom         | High income         | 20800 | 12900 | 62.3 | 14.0 | 9.8  | 23200 | 17300 | 74.7 | 12.9 | 9.5  | 43900 | 30300 | 68.8 | 13.4 | 9.7  |
| <b>Southern Europe</b> |                     |       |       |      |      |      |       |       |      |      |      |       |       |      |      |      |
| Albania                | Upper middle income | 450   | 300   | 66.8 | 19.0 | 15.1 | 70    | 10    | 7.0  | 3.1  | 0.5  | 530   | 310   | 58.5 | 11.7 | 8.4  |
| Bosnia and Herzegovina | Upper middle income | 1400  | 1100  | 81.1 | 31.3 | 27.0 | 570   | 370   | 65.4 | 12.1 | 8.7  | 1900  | 1500  | 76.5 | 21.6 | 17.8 |
| Croatia                | High income         | 1700  | 1400  | 82.4 | 28.2 | 24.0 | 1100  | 840   | 77.9 | 18.7 | 15.3 | 2800  | 2200  | 80.6 | 23.3 | 19.5 |
| Cyprus                 | High income         | 1200  | 1100  | 87.3 | 41.9 | 37.6 | 460   | 330   | 73.3 | 12.5 | 9.1  | 1700  | 1400  | 83.5 | 27.0 | 23.1 |
| Greece                 | High income         | 5900  | 4900  | 83.0 | 28.6 | 24.5 | 2800  | 2100  | 72.6 | 15.0 | 11.6 | 8700  | 6900  | 79.7 | 21.6 | 17.9 |
| Italy                  | High income         | 16000 | 10100 | 63.3 | 13.5 | 9.3  | 16200 | 11600 | 71.5 | 11.8 | 8.4  | 32200 | 21800 | 67.5 | 12.7 | 8.9  |
| Malta                  | High income         | 90    | 50    | 53.6 | 9.5  | 5.5  | 70    | 40    | 54.5 | 10.7 | 7.3  | 160   | 90    | 54.0 | 10.0 | 6.3  |
| Montenegro             | Upper middle income | 280   | 220   | 81.3 | 31.9 | 27.6 | 160   | 120   | 76.6 | 15.4 | 12.0 | 440   | 350   | 79.5 | 23.8 | 20.0 |
| North Macedonia        | Upper middle income | 550   | 410   | 74.6 | 23.8 | 19.6 | 280   | 170   | 61.5 | 12.1 | 8.7  | 830   | 580   | 70.2 | 18.0 | 14.1 |
| Portugal               | High income         | 4300  | 3400  | 78.9 | 25.4 | 21.1 | 2100  | 1300  | 64.1 | 10.0 | 6.5  | 6300  | 4700  | 74.0 | 17.6 | 13.8 |
| Serbia                 | Upper middle income | 2700  | 2100  | 78.4 | 28.7 | 24.6 | 2000  | 1600  | 77.8 | 19.1 | 15.7 | 4700  | 3600  | 78.1 | 23.9 | 20.2 |
| Slovenia               | High income         | 520   | 340   | 65.1 | 14.9 | 10.6 | 800   | 640   | 81.5 | 17.2 | 13.9 | 1300  | 980   | 75.0 | 16.1 | 12.4 |
| Spain                  | High income         | 16200 | 11600 | 71.9 | 17.6 | 13.4 | 14100 | 10300 | 73.1 | 15.8 | 12.4 | 30300 | 21900 | 72.4 | 16.6 | 12.9 |
| <b>Western Europe</b>  |                     |       |       |      |      |      |       |       |      |      |      |       |       |      |      |      |
| Austria                | High income         | 2300  | 1400  | 60.8 | 14.9 | 10.8 | 2700  | 2000  | 74.5 | 15.3 | 11.9 | 4900  | 3400  | 68.3 | 15.1 | 11.4 |
| Belgium                | High income         | 3700  | 2500  | 65.9 | 16.4 | 12.2 | 4200  | 3200  | 76.5 | 16.0 | 12.6 | 8000  | 5700  | 71.6 | 16.2 | 12.4 |
| France                 | High income         | 28200 | 21100 | 75.0 | 25.0 | 20.7 | 30300 | 24100 | 79.5 | 20.3 | 16.9 | 58400 | 45200 | 77.3 | 22.6 | 18.8 |
| Germany                | High income         | 22200 | 14400 | 64.8 | 17.6 | 13.4 | 24100 | 18100 | 75.3 | 15.3 | 11.9 | 46200 | 32500 | 70.3 | 16.5 | 12.7 |
| Luxembourg             | High income         | 180   | 100   | 53.0 | 12.7 | 8.5  | 280   | 210   | 76.2 | 12.0 | 8.6  | 450   | 310   | 67.1 | 12.5 | 8.6  |

|                                                   |                     |      |      |      |      |      |      |      |      |      |      |       |       |      |      |      |
|---------------------------------------------------|---------------------|------|------|------|------|------|------|------|------|------|------|-------|-------|------|------|------|
| The Netherlands                                   | High income         | 5700 | 3800 | 67.7 | 17.1 | 12.9 | 7800 | 6400 | 82.6 | 17.8 | 14.4 | 13400 | 10300 | 76.3 | 17.5 | 13.7 |
| Switzerland                                       | High income         | 2000 | 930  | 46.8 | 10.5 | 6.4  | 2900 | 2100 | 71.3 | 9.7  | 6.4  | 4900  | 3020  | 61.4 | 10.2 | 6.5  |
| <b>Oceania</b>                                    |                     |      |      |      |      |      |      |      |      |      |      |       |       |      |      |      |
| <i><b>Australia and New Zealand</b></i>           |                     |      |      |      |      |      |      |      |      |      |      |       |       |      |      |      |
| Australia                                         | High income         | 8200 | 4500 | 55.0 | 12.4 | 8.2  | 7900 | 4900 | 62.6 | 10.0 | 6.6  | 16100 | 9500  | 58.7 | 11.2 | 7.4  |
| New Zealand                                       | High income         | 1700 | 1000 | 62.4 | 16.6 | 12.3 | 1600 | 1100 | 69.5 | 13.2 | 9.8  | 3300  | 2200  | 65.9 | 14.9 | 11.0 |
| <i><b>Melanesia, Micronesia and Polynesia</b></i> |                     |      |      |      |      |      |      |      |      |      |      |       |       |      |      |      |
| Fiji                                              | Upper middle income | 60   | 20   | 29.0 | 5.9  | 2.0  | 40   | 10   | 22.7 | 3.6  | 0.9  | 100   | 30    | 26.4 | 4.6  | 1.4  |
| France, New Caledonia                             | High income         | 150  | 120  | 76.6 | 31.7 | 27.4 | 100  | 70   | 71.7 | 13.6 | 10.1 | 250   | 190   | 74.6 | 22.7 | 18.8 |
| France, Polynesia                                 | High income         | 160  | 130  | 79.4 | 36.8 | 32.7 | 60   | 40   | 61.6 | 13.0 | 9.6  | 220   | 170   | 74.2 | 24.9 | 21.1 |
| Guam                                              | High income         | 90   | 80   | 80.9 | 30.4 | 26.6 | 70   | 60   | 79.5 | 13.6 | 10.4 | 170   | 130   | 80.3 | 22.1 | 18.6 |
| Papua New Guinea                                  | Lower middle income | 1000 | 510  | 50.8 | 8.6  | 4.7  | 820  | 280  | 34.8 | 5.6  | 2.2  | 1800  | 800   | 43.6 | 7.0  | 3.4  |
| Samoa                                             | Upper middle income | 80   | 60   | 78.5 | 25.3 | 21.0 | 40   | 30   | 70.4 | 11.0 | 7.9  | 120   | 90    | 75.6 | 18.2 | 14.5 |
| Solomon Islands                                   | Lower middle income | 70   | 10   | 18.1 | 5.0  | 1.4  | 30   | 0    | 5.1  | 2.4  | 0.2  | 90    | 10    | 14.4 | 3.7  | 0.8  |
| Vanuatu                                           | Lower middle income | 50   | 20   | 50.2 | 8.3  | 4.8  | 20   | 10   | 50.2 | 2.5  | 1.1  | 60    | 30    | 50.2 | 5.4  | 3.0  |

## References

1. Møller B, Fekjær H, Hakulinen T, Sigvaldason H, Storm HH, Talbäck M, et al. Prediction of cancer incidence in the Nordic countries: empirical comparison of different approaches. *Stat Med*. 2003;22(17):2751–66.
2. International Agency for Research on Cancer. Global Cancer Observatory: Cancer Today [Internet]. 2024. Available from: <https://gco.iarc.fr/en>
3. Thun MJ, Hannan LM, Adams-Campbell LL, Boffetta P, Buring JE, Feskanich D, et al. Lung Cancer Occurrence in Never-Smokers: An Analysis of 13 Cohorts and 22 Cancer Registry Studies. *PLoS Med*. 2008;5(9):1357–71.
4. Barendregt JJ, Veerman JL. Categorical versus continuous risk factors and the calculation of potential impact fractions. *J Epidemiol Community Health*. 2010;64(3):209–12.
5. Ait Ouakrim D, Wilson T, Waa A, Maddox R, Andrabi H, Mishra SR, et al. Tobacco endgame intervention impacts on health gains and Māori:non-Māori health inequity: a simulation study of the Aotearoa/New Zealand Tobacco Action Plan. *Tob Control*. 2023;tc-2022-057655.
